# Supplementary material
Source: Elsevier journal article supplement (https://web.archive.org/web/20221210135809/https://authors.library.caltech.edu/35195/2/mmc1.pdf)
Supplement: mmc1 [file mmc1.pdf]

## **HIBINO et al. SUPPLEMENTARY MATERIALS**

1. Table S1. Immune related gene models of the *S. purpuratus* genome.
2. Table S2. Toll-like receptor (TLR) gene models of the *S. purpuratus* genome.
3. Table S3. NACHT-LRR (NLR) gene models of the *S. purpuratus* genome.
4. Table S4. SRCR gene models of the *S. purpuratus* genome.
5. Table S5. Immune related transcription factor gene models of the *S. purpuratus* genome.
6. Figure legends for Supplementary Figures S1-S7.
7. Figure S1
8. Figure S2
9. Figure S3
10. Figure S4
11. Figure S5
12. Figure S6
13. Figure S7

Supplementary Table S1. Complete categorized list of immunity-related genes found in *Strongylocentrotus purpuratus* genome sequence.

| I. IMMUNITY                                                         |                                  |                                        |
|---------------------------------------------------------------------|----------------------------------|----------------------------------------|
| Gene Category                                                       | Gene model ID                    | Assigned name                          |
| <b>I.A1 Immune receptors - Pattern Recognition Receptors (PRRs)</b> |                                  |                                        |
| Toll-Like Receptors (TLRs)                                          | 222 models                       | Please refer to Supplementary Table S2 |
| NACTH and Leucine-rich Repeat receptors (NLRs)                      | 203 models                       | Please refer to Supplementary Table S3 |
| Scavenger Receptor Cysteine-Rich (SRCR) repeat proteins             | 218 models                       | Please refer to Supplementary Table S4 |
| CD36-like                                                           | SPU_007495                       | <i>Sp-CD36 antigen-like</i>            |
|                                                                     | SPU_018904 (E)                   | <i>Sp-scavenger receptor B1-like</i>   |
|                                                                     | SPU_020799                       | <i>Sp-scavenger receptor B2-like1</i>  |
|                                                                     | SPU_025565                       | <i>Sp-scavenger receptor B2-like2</i>  |
|                                                                     | SPU_003486/26720 <sup>(1)</sup>  | <i>Sp-scavenger receptor BIII-like</i> |
| PG-Recognition Proteins (PGRPs)                                     | SPU_023247                       | <i>Sp-PGRP1</i>                        |
|                                                                     | SPU_007946                       | <i>Sp-PGRP2</i>                        |
|                                                                     | SPU_000222                       | <i>Sp-PGRP3</i>                        |
|                                                                     | SPU_003882                       | <i>Sp-PGRP4</i>                        |
|                                                                     | SPU_030064                       | <i>Sp-PGRP5</i>                        |
| Gram-Negative Binding Protein (GNBP)1/2/3                           | SPU_016163                       | <i>Sp-GNBPI/2/3A</i>                   |
|                                                                     | SPU_006529/006530 <sup>(1)</sup> | <i>Sp-GNBPI/2/3B</i>                   |
|                                                                     | SPU_024075                       | <i>Sp-GNBPI/2/3C</i>                   |
| RIG-I/LGP2/MDA-5                                                    | SPU_014310                       | <i>Sp-RIG-I like 1</i>                 |
|                                                                     | SPU_025885                       | <i>Sp-RIG-I like 2</i>                 |
|                                                                     | SPU_011866                       | <i>Sp-RIG-I like 3</i>                 |
|                                                                     | SPU_014311                       | <i>Sp-RIG-I like 4</i>                 |
|                                                                     | SPU_007126                       | <i>Sp-RIG-I like 5</i>                 |
|                                                                     | SPU_014119                       | <i>Sp-RIG-I like 6</i>                 |
|                                                                     | SPU_010536                       | <i>Sp-RIG-I like 7</i>                 |
|                                                                     | SPU_005476                       | <i>Sp-RIG-I like 8</i>                 |
|                                                                     | SPU_019617                       | <i>Sp-RIG-I like 9</i>                 |
|                                                                     | SPU_016718 (E)                   | <i>Sp-RIG-I like 10</i>                |
|                                                                     | SPU_020020 (E)                   | <i>Sp-RIG-I like 11</i>                |
|                                                                     | SPU_000006 (E)                   | <i>Sp-RIG-I like 12</i>                |

(1) Two or more model IDs have been assigned to the same gene due to any of the following reasons: a) They represent duplicated models of the same gene; b) They correspond to both alleles of the same locus; c) They contain partial fragments of a gene broken up into more than one model.

(E) indicates embryonic expression of the gene model as indicated by hybridization of pooled RNA samples from egg, early blastula, gastrula and prism stage embryos to a high-density tiling array of the *S. purpuratus* genome (Samanta *et al.*, 2006)

Table S1 (cont.) - Complete list of immunity-related genes

| Gene Category                                                | Gene model ID  | Assigned name                              |
|--------------------------------------------------------------|----------------|--------------------------------------------|
| IMCV<br>(Ips-1/MAVS/Cardif/VISA)                             | SPU_017445     | <i>Sp-IMCV-like</i>                        |
| <b>I.A2 Immune receptors - C-type lectin domain proteins</b> |                |                                            |
| Echinoidin-like                                              | SPU_000839     | <i>Sp-echinoidin-like1</i>                 |
|                                                              | SPU_000906     | <i>Sp-Echinoidin / Sp-echinoidin-like2</i> |
|                                                              | SPU_001821     | <i>Sp-echinoidin-like3</i>                 |
|                                                              | SPU_005127     | <i>Sp-echinoidin-like4</i>                 |
|                                                              | SPU_015211     | <i>Sp-CLECT</i>                            |
|                                                              | SPU_022861     | <i>Sp-CLECT</i>                            |
|                                                              | SPU_025892     | <i>Sp-CLECT</i>                            |
|                                                              | SPU_008393     | <i>Sp-CLECT</i>                            |
|                                                              | SPU_022396     | <i>Sp-CLECT</i>                            |
|                                                              | SPU_007040     | <i>Sp-CLECT</i>                            |
|                                                              |                | SPU_007882 (E)                             |
| Additional small                                             | SPU_028432     | <i>Sp-CLECT</i>                            |
| C-type lectin domain proteins                                | SPU_010101     | <i>Sp-CLECT</i>                            |
|                                                              | SPU_003618     | <i>Sp-CLECT</i>                            |
|                                                              | SPU_014221     | <i>Sp-ELI-like3</i>                        |
|                                                              | SPU_003774     | <i>Sp-CLECT</i>                            |
| <b>I.A3 Immune receptors - Ig superfamily</b>                |                |                                            |
| IG <sub>v</sub> -IG <sub>C1/C2</sub> IGSF genes              | SPU_013709     | <i>Sp-VC1_1</i>                            |
|                                                              | SPU_030071 (E) | <i>Sp-VC1_2</i>                            |
|                                                              | SPU_030081     | <i>Sp-VC1_3</i>                            |
|                                                              | SPU_000577     | <i>Sp-IGv fragment</i>                     |
|                                                              | SPU_011076     | <i>Sp-JAM-like1</i>                        |
|                                                              | SPU_002608 (E) | <i>Sp-VC2_1</i>                            |
|                                                              | SPU_012388     | <i>Sp-IGv-c1</i>                           |
|                                                              | SPU_024439 (E) | <i>Sp-SIRPB/G-like1</i>                    |
|                                                              |                | SPU_024787                                 |
| B7-like IGSF genes                                           | SPU_010746     | <i>Sp-B7-like1</i>                         |
|                                                              | SPU_017228     | <i>Sp-B7-like2</i>                         |
|                                                              | SPU_020457     | <i>Sp-B7-like3</i>                         |
|                                                              | SPU_028300     | <i>Sp-B7-like4</i>                         |
|                                                              | SPU_028510     | <i>Sp-B7-like5</i>                         |
| ITAM-containing Ig                                           | SPU_013624     | <i>Sp-IG/ITAM-c1</i>                       |

(1) Two or more model IDs have been assigned to the same gene due to any of the following reasons: a) They represent duplicated models of the same gene; b) They correspond to both alleles of the same locus; c) They contain partial fragments of a gene broken up into more than one model.

(E) indicates embryonic expression of the gene model as indicated by hybridization of pooled RNA samples from egg, early blastula, gastrula and prism stage embryos to a high-density tiling array of the *S. purpuratus* genome (Samanta *et al.*, 2006)

Table S1 (cont.) - Complete list of immunity-related genes

| Gene Category                                                                                                                                                                                                                                                                                                                                               | Gene model ID                                      | Assigned name                              |
|-------------------------------------------------------------------------------------------------------------------------------------------------------------------------------------------------------------------------------------------------------------------------------------------------------------------------------------------------------------|----------------------------------------------------|--------------------------------------------|
| <b>I.A3 Immune receptors - Ig superfamily (cont.)</b>                                                                                                                                                                                                                                                                                                       |                                                    |                                            |
| Genes for which no models with evident homology or similar domain structure could be found using the search criteria detailed in <i>Materials and Methods</i> : CD14, CD244/NKCR2B4, KIR-like p91A, KIRs, KLRDs, LAIR, LIR, Ly49/NKR, NKp30, NKp44, NKp46, NKp80, NITR, CD66/CEACAM1, SIGLEC, Leukotriene B4 Receptor 1/2, CysteinyI-leukotriene Receptor 1 |                                                    |                                            |
| <b>I.A4 Genes associated with VDJ recombination</b>                                                                                                                                                                                                                                                                                                         |                                                    |                                            |
| TdT/Pol- $\mu$                                                                                                                                                                                                                                                                                                                                              | SPU_009980                                         | <i>Sp-TdT1 / Pol-<math>\mu</math></i>      |
| Rag1                                                                                                                                                                                                                                                                                                                                                        | SPU_027600 (E)                                     | <i>Sp-Rag1L</i>                            |
| Rag2                                                                                                                                                                                                                                                                                                                                                        | SPU_030091 (E)                                     | <i>Sp-Rag2L</i>                            |
| Ku70                                                                                                                                                                                                                                                                                                                                                        | SPU_009797 (E)                                     | <i>Sp-Ku70-like</i>                        |
| Ku80                                                                                                                                                                                                                                                                                                                                                        | SPU_009224/006396 <sup>(1)</sup>                   | <i>Sp-Ku86-like</i>                        |
| DNA ligase IV                                                                                                                                                                                                                                                                                                                                               | SPU_018243 (E)                                     | <i>Sp-Dnl-4</i>                            |
| xrrc4                                                                                                                                                                                                                                                                                                                                                       | SPU_024517 (E)                                     | <i>Sp-xrrc4</i>                            |
| Xlf / CERNUNNOS                                                                                                                                                                                                                                                                                                                                             | SPU_012239 (E)                                     | <i>Sp-Cernunnos</i>                        |
| DNA-PKcs                                                                                                                                                                                                                                                                                                                                                    | SPU_015484                                         | <i>Sp-DNA-PKcs - (N-terminus)</i>          |
|                                                                                                                                                                                                                                                                                                                                                             | SPU_015529 (E)                                     | <i>Sp-DNA-PKcs - (C-terminus)</i>          |
| DNA cross-link repair 1 /                                                                                                                                                                                                                                                                                                                                   | SPU_003308                                         | <i>Sp-Dclr-1</i>                           |
| Artemis                                                                                                                                                                                                                                                                                                                                                     | SPU_021517                                         | <i>Sp-Dclr-2</i>                           |
| <b>I.B1 Effector Genes - Complement</b>                                                                                                                                                                                                                                                                                                                     |                                                    |                                            |
| C3/4/5                                                                                                                                                                                                                                                                                                                                                      | SPU_005182/012439/<br>018503/017239 <sup>(1)</sup> | <i>Sp-064 / Sp-C3</i>                      |
|                                                                                                                                                                                                                                                                                                                                                             | SPU_000997 (E)                                     | <i>Sp-C3-2</i>                             |
| Thioester-containing                                                                                                                                                                                                                                                                                                                                        | SPU_022988 (E)                                     | <i>Sp-TCP1</i>                             |
|                                                                                                                                                                                                                                                                                                                                                             | SPU_005193 (E)                                     | <i>Sp-TCP2</i>                             |
| Mannose Binding Protein                                                                                                                                                                                                                                                                                                                                     | SPU_004869                                         | <i>SpSM30-F</i>                            |
| C2/Factor B                                                                                                                                                                                                                                                                                                                                                 | SPU_028188                                         | <i>Sp-factor B</i>                         |
|                                                                                                                                                                                                                                                                                                                                                             | SPU_028187                                         | <i>Sp-factor B-2 / SpBf-2</i>              |
|                                                                                                                                                                                                                                                                                                                                                             | SPU_009091                                         | <i>Sp-factor B-3 / SpBf-3</i>              |
| C1q                                                                                                                                                                                                                                                                                                                                                         | SPU_005500                                         | <i>Sp-C1q-like</i>                         |
|                                                                                                                                                                                                                                                                                                                                                             | SPU_006578 (E)                                     | <i>Sp-C1q-like</i>                         |
|                                                                                                                                                                                                                                                                                                                                                             | SPU_009401                                         | <i>Sp-C1q-like</i>                         |
|                                                                                                                                                                                                                                                                                                                                                             | SPU_009020                                         | <i>Sp-C1q-like</i>                         |
| CD59                                                                                                                                                                                                                                                                                                                                                        | SPU_030142                                         | <i>Sp-CD59 / Sca2-like1.</i>               |
|                                                                                                                                                                                                                                                                                                                                                             | SPU_030143                                         | <i>Sp-CD59 / Sca2-like2.</i>               |
| Additional thioester<br>containing genes                                                                                                                                                                                                                                                                                                                    | SPU_006406/026313 <sup>(1)</sup>                   | <i>Sp-thioester containing protein-1</i>   |
|                                                                                                                                                                                                                                                                                                                                                             | SPU_019422 (E)                                     | <i>Sp-thioester containing protein-2</i>   |
|                                                                                                                                                                                                                                                                                                                                                             | SPU_013170/013169 <sup>(1)</sup>                   | <i>Sp-thioester containing protein-4/5</i> |

(1) Two or more model IDs have been assigned to the same gene due to any of the following reasons: a) They represent duplicated models of the same gene; b) They correspond to both alleles of the same locus; c) They contain partial fragments of a gene broken up into more than one model.

(E) indicates embryonic expression of the gene model as indicated by hybridization of pooled RNA samples from egg, early blastula, gastrula and prism stage embryos to a high-density tiling array of the *S. purpuratus* genome (Samanta *et al.*, 2006)

Table S1 (cont.) - Complete list of immunity-related genes

| Gene Category                                                                                                                                                                                                                                                                                                                    | Gene model ID                        | Assigned name                   |
|----------------------------------------------------------------------------------------------------------------------------------------------------------------------------------------------------------------------------------------------------------------------------------------------------------------------------------|--------------------------------------|---------------------------------|
| <b>I.B1 Effector Genes - Complement (cont.)</b>                                                                                                                                                                                                                                                                                  |                                      |                                 |
| Genes for which no models with evident homology or similar domain structure could be found using the search criteria detailed in <i>Materials and Methods</i> : C1r, C1s, MASP1/2, C6-9 (terminal pathway), CR1, CR2, CR3/Mac-1/ITGAM, CR4/ITGAX, Curry, C3aR1, C5R1, MCP, DAF, H Factor, I Factor, D Factor/adipsin, Properdin. |                                      |                                 |
| <b>I.B2 Effector Genes - Cytolytic pathways</b>                                                                                                                                                                                                                                                                                  |                                      |                                 |
| Perforin-related<br>(MACPF domain<br>containing genes)                                                                                                                                                                                                                                                                           | SPU_005223                           | <i>Sp-MACPF-A.1</i>             |
|                                                                                                                                                                                                                                                                                                                                  | SPU_022091                           | <i>Sp-MACPF-A.2</i>             |
|                                                                                                                                                                                                                                                                                                                                  | SPU_014984                           | <i>Sp-MACPF-A.3</i>             |
|                                                                                                                                                                                                                                                                                                                                  | SPU_017952                           | <i>Sp-MACPF-A.4</i>             |
|                                                                                                                                                                                                                                                                                                                                  | SPU_002548/002549 <sup>(1)</sup> (E) | <i>Sp-MACPF-B.0</i>             |
|                                                                                                                                                                                                                                                                                                                                  | SPU_002550 (E)                       | <i>Sp-MACPF-B.1</i>             |
|                                                                                                                                                                                                                                                                                                                                  | SPU_015144 (E)                       | <i>Sp-MACPF-B.2</i>             |
|                                                                                                                                                                                                                                                                                                                                  | SPU_016546 (E)                       | <i>Sp-MACPF-B.3</i>             |
|                                                                                                                                                                                                                                                                                                                                  | SPU_001794 (E)                       | <i>Sp-MACPF-C.1</i>             |
|                                                                                                                                                                                                                                                                                                                                  | SPU_001797 (E)                       | <i>Sp-MACPF-C.2</i>             |
|                                                                                                                                                                                                                                                                                                                                  | SPU_014677                           | <i>Sp-MACPF-C.3</i>             |
|                                                                                                                                                                                                                                                                                                                                  | SPU_000751                           | <i>Sp-MACPF-D.1</i>             |
|                                                                                                                                                                                                                                                                                                                                  | SPU_022318                           | <i>Sp-MACPF-D.2</i>             |
|                                                                                                                                                                                                                                                                                                                                  | SPU_026119                           | <i>Sp-MACPF-D.3</i>             |
|                                                                                                                                                                                                                                                                                                                                  | SPU_027405                           | <i>Sp-MACPF-D.4</i>             |
|                                                                                                                                                                                                                                                                                                                                  | SPU_007159                           | <i>Sp-MACPF-E.1</i>             |
|                                                                                                                                                                                                                                                                                                                                  | SPU_028756                           | <i>Sp-MACPF-E.2</i>             |
|                                                                                                                                                                                                                                                                                                                                  | SPU_022230                           | <i>Sp-MACPF-E.3</i>             |
|                                                                                                                                                                                                                                                                                                                                  | SPU_008485                           | <i>Sp-MACPF-E.4</i>             |
|                                                                                                                                                                                                                                                                                                                                  | SPU_014229                           | <i>Sp-MACPF-F.1</i>             |
| SPU_006818                                                                                                                                                                                                                                                                                                                       | <i>Sp-MACPF-G.1</i>                  |                                 |
| Cathepsin A                                                                                                                                                                                                                                                                                                                      | SPU_012846 (E)                       | <i>Sp-Ppqb</i>                  |
|                                                                                                                                                                                                                                                                                                                                  | SPU_013245                           | <i>Sp-Ppqb</i>                  |
|                                                                                                                                                                                                                                                                                                                                  | SPU_015939 (E)                       | <i>Sp-Ppqb</i>                  |
|                                                                                                                                                                                                                                                                                                                                  | SPU_026832 (E)                       | <i>Sp-Ppqb</i>                  |
| Cathepsin B                                                                                                                                                                                                                                                                                                                      | SPU_007151                           | <i>Sp-CTSB</i>                  |
| Cathepsin C                                                                                                                                                                                                                                                                                                                      | SPU_005834                           | <i>Sp-Cts1 / Sp-CtsC</i>        |
| Cathepsin F                                                                                                                                                                                                                                                                                                                      | SPU_014914 (E)                       | <i>Sp-Cts10 / Sp-CtsF-like1</i> |
| Cathepsin L                                                                                                                                                                                                                                                                                                                      | SPU_009042 (E)                       | <i>Sp-Cts2 / CtsL-like1</i>     |
|                                                                                                                                                                                                                                                                                                                                  | SPU_014765                           | <i>Sp-Cts9 / CtsL-like5</i>     |
|                                                                                                                                                                                                                                                                                                                                  | SPU_014766                           | <i>Sp-Cts6 / CtsL-like2</i>     |
|                                                                                                                                                                                                                                                                                                                                  | SPU_014767                           | <i>Sp-Cts7 / Sp-CtsL-like3</i>  |
|                                                                                                                                                                                                                                                                                                                                  | SPU_014768                           | <i>Sp-Cts8 / Sp-CtsL-like4</i>  |
|                                                                                                                                                                                                                                                                                                                                  | SPU_015668                           | <i>Sp-Cts11 / Sp-CtsL-like6</i> |

(1) Two or more model IDs have been assigned to the same gene due to any of the following reasons: a) They represent duplicated models of the same gene; b) They correspond to both alleles of the same locus; c) They contain partial fragments of a gene broken up into more than one model.

(E) indicates embryonic expression of the gene model as indicated by hybridization of pooled RNA samples from egg, early blastula, gastrula and prism stage embryos to a high-density tiling array of the *S. purpuratus* genome (Samanta *et al.*, 2006)

Table S1 (cont.) - Complete list of immunity-related genes

| Gene Category                                                              | Gene model ID                        | Assigned name                                     |
|----------------------------------------------------------------------------|--------------------------------------|---------------------------------------------------|
| <b>I.B2 Effector Genes - Cytolytic pathways (cont.)</b>                    |                                      |                                                   |
| Cathepsin L (cont.)                                                        | SPU_020837                           | <i>Sp-Cts12 / Sp-CtsL-like7</i>                   |
|                                                                            | SPU_020838                           | <i>Sp-Cts13 / Sp-CtsL-like8</i>                   |
| Cathepsin Z                                                                | SPU_009601 (E)                       | <i>Sp-Cts4 / Sp-CtsZ-like1</i>                    |
|                                                                            | SPU_013893 (E)                       | <i>Sp-Cts5 / Sp-CtsZ-like2</i>                    |
| Novel Cathepsin                                                            | SPU_009368                           | <i>Sp-Cts3</i>                                    |
| Granzymes                                                                  | SPU_023706                           | <i>Sp-Gramar-like1 (Granzyme/Marapsin-like 1)</i> |
|                                                                            | SPU_001588                           | <i>Sp-Gramar-like2 (Granzyme/Marapsin-like 2)</i> |
|                                                                            | SPU_016107                           | <i>Sp-Gramar-like3 (Granzyme/Marapsin-like 3)</i> |
| <b>I.B3 Effector genes - Additional cytotoxic effectors and regulators</b> |                                      |                                                   |
| NOS                                                                        | SPU_002328/025118 <sup>(1)</sup> (E) | <i>Sp-nNos.</i>                                   |
|                                                                            | SPU_016283/013373 <sup>(1)</sup>     | <i>Sp-nNos</i>                                    |
|                                                                            | SPU_019970                           | <i>Sp-Nos1</i>                                    |
| Peroxidase                                                                 | SPU_008911                           | <i>Sp-Hdpx-1</i>                                  |
|                                                                            | SPU_019097                           | <i>Sp-Hdpx-2</i>                                  |
|                                                                            | SPU_002004 (E)                       | <i>Sp-Hdpx-3</i>                                  |

Genes for which no models with evident homology or similar domain structure could be found using the search criteria detailed in *Materials and Methods*: Defensins/Cationic proteins, Antibacterial peptides, Lysozyme, Serglycin/PRG1, C-reactive protein, Cox1 /2D. *melanogaster* CLIP-domain serine proteases.

#### I.C Sea urchin immune response genes

|           |                |                                               |
|-----------|----------------|-----------------------------------------------|
| DD185/333 | SPU_011836 (E) | <i>Sp-185/333-Ex</i>                          |
|           | SPU_019327     | <i>Sp-185/333-B3d (Possibly a pseudogene)</i> |
|           | SPU_022178     | <i>Sp-185/333-E2</i>                          |
|           | SPU_022179     | <i>Sp-185/333-D1</i>                          |
|           | SPU_030144     | <i>Sp-185/333-01</i>                          |
|           | SPU_030145     | <i>Sp-185/333-02</i>                          |
|           | SPU_030146     | <i>Sp-185/333-03</i>                          |

## II. REGULATORY PATHWAYS

| Gene Category                                                        | Gene model ID                        | Assigned name  |
|----------------------------------------------------------------------|--------------------------------------|----------------|
| <b>II.A1 Intracellular signal transduction - NFκB / IRF pathways</b> |                                      |                |
| NFκB                                                                 | SPU_008177 (E)                       | <i>Sp-Nfkb</i> |
|                                                                      | SPU_012203 (E)                       | <i>Sp-rel</i>  |
| IκB                                                                  | SPU_011197 (E)                       | <i>Sp-IkB</i>  |
| IKK                                                                  | SPU_008254/016839 <sup>(1)</sup>     | <i>SpIKK1</i>  |
|                                                                      | SPU_008255/016839 <sup>(1)</sup> (E) | <i>SpIKK2</i>  |

(1) Two or more model IDs have been assigned to the same gene due to any of the following reasons: a) They represent duplicated models of the same gene; b) They correspond to both alleles of the same locus; c) They contain partial fragments of a gene broken up into more than one model.

(E) indicates embryonic expression of the gene model as indicated by hybridization of pooled RNA samples from egg, early blastula, gastrula and prism stage embryos to a high-density tiling array of the *S. purpuratus* genome (Samanta *et al.*, 2006)

Table S1 (cont.) - Complete list of immunity-related genes

| Gene Category                                                                | Gene model ID                        | Assigned name        |
|------------------------------------------------------------------------------|--------------------------------------|----------------------|
| <b>II.A1 Intracellular signal transduction - NFkB / IRF pathways (cont.)</b> |                                      |                      |
| IKK (cont.)                                                                  | SPU_027909/007638 <sup>(1)</sup>     | <i>SpIKK epsilon</i> |
| TBK1/NAK                                                                     | SPU_004671                           | <i>SpTBK1</i>        |
| TRAF1-6                                                                      | SPU_012840/010527 <sup>(1)</sup> (E) | <i>Sp-Traf1</i>      |
|                                                                              | SPU_026479                           | <i>Sp-TRAF1</i>      |
|                                                                              | SPU_026495                           | <i>Sp-Traf3</i>      |
|                                                                              | SPU_008332                           | <i>Sp-Traf4</i>      |
|                                                                              | SPU_028898                           | <i>Sp-Traf6</i>      |
|                                                                              | SPU_023069 (E)                       | <i>Sp-Traf-B</i>     |
|                                                                              | SPU_003462 (E)                       | <i>Sp-Traf-A</i>     |
|                                                                              | TRIAD                                | SPU_030065 (E)       |
| TAK1/MAP3K7                                                                  | SPU_002696 (E)                       | <i>Sp-TAK1</i>       |
| MAP3K7IP1/TAB1                                                               | SPU_005254 (E)                       | <i>Sp-Tab1</i>       |
| TAB2/3                                                                       | SPU_012219/003955 <sup>(1)</sup> (E) | <i>Sp-Tab2/3</i>     |
| UBC13                                                                        | SPU_018598 (E)                       | <i>Sp-Ubc13</i>      |
| UEV1A                                                                        | SPU_000742                           | <i>Sp-Ube2v1/2</i>   |
| SINK                                                                         | SPU_013349 (E)                       | <i>SpSINK</i>        |
| IRF                                                                          | SPU_010404                           | <i>Sp-Irf</i>        |
|                                                                              | SPU_026877                           | <i>Sp-Irf4</i>       |

Genes for which no models with evident homology or similar domain structure could be found using the search criteria detailed in *Materials and Methods*: IKKgamma/NEMO, Sik/Brk/PTK6.

#### II.A2 Intracellular signal transduction - TLR adaptor molecules

|                                       |                                  |                       |
|---------------------------------------|----------------------------------|-----------------------|
| MYD88                                 | SPU_007342/007343 <sup>(1)</sup> | <i>Sp-Myd88</i>       |
|                                       | SPU_001905                       | <i>Sp-Myd88-like1</i> |
|                                       | SPU_022707 (E)                   | <i>Sp-Myd88-like2</i> |
|                                       | SPU_022708                       | <i>Sp-Myd88-like3</i> |
| SARM                                  | SPU_011042                       | <i>Sp-Sarm.</i>       |
| Novel family of<br>SARM-related genes | SPU_006122                       | <i>Sp-Sarm-r1</i>     |
|                                       | SPU_020008                       | <i>Sp-Sarm-r2</i>     |
|                                       | SPU_007020                       | <i>Sp-Sarm-r3</i>     |
|                                       | SPU_000764 (E)                   | <i>Sp-Sarm-r4</i>     |
|                                       | SPU_015127                       | <i>Sp-Sarm-r5</i>     |
|                                       | SPU_021841                       | <i>Sp-Sarm-r6</i>     |
|                                       | SPU_018859                       | <i>Sp-Sarm-r7</i>     |
|                                       | SPU_027639/027640 <sup>(1)</sup> | <i>Sp-Sarm-r8</i>     |

(1) Two or more model IDs have been assigned to the same gene due to any of the following reasons: a) They represent duplicated models of the same gene; b) They correspond to both alleles of the same locus; c) They contain partial fragments of a gene broken up into more than one model.

(E) indicates embryonic expression of the gene model as indicated by hybridization of pooled RNA samples from egg, early blastula, gastrula and prism stage embryos to a high-density tiling array of the *S. purpuratus* genome (Samanta *et al.*, 2006)

Table S1 (cont.) - Complete list of immunity-related genes

| Gene Category                                                                                                                                                                                                                        | Gene model ID                    | Assigned name         |
|--------------------------------------------------------------------------------------------------------------------------------------------------------------------------------------------------------------------------------------|----------------------------------|-----------------------|
| <b>II.A2 Intracellular signal transduction - TLR adaptor molecules (cont.)</b>                                                                                                                                                       |                                  |                       |
| Novel family of                                                                                                                                                                                                                      | SPU_018168                       | <i>Sp-Sarm-r9</i>     |
| SARM-related genes                                                                                                                                                                                                                   | SPU_003495                       | <i>Sp-Sarm-r10</i>    |
| (cont.)                                                                                                                                                                                                                              | SPU_004557 (E)                   | <i>Sp-Sarm-r11</i>    |
|                                                                                                                                                                                                                                      | SPU_004107                       | <i>Sp-Sarm-r12</i>    |
|                                                                                                                                                                                                                                      | SPU_008302                       | <i>Sp-Sarm-r13</i>    |
|                                                                                                                                                                                                                                      | SPU_007088                       | <i>Sp-Sarm-r14</i>    |
| Novel family of TIR                                                                                                                                                                                                                  | SPU_016014                       | <i>Sp-TIR-c1</i>      |
| TIR domain containing                                                                                                                                                                                                                | SPU_007952/013299 <sup>(1)</sup> | <i>Sp-TIR-c2</i>      |
| genes                                                                                                                                                                                                                                | SPU_014926                       | <i>Sp-TIR-c3</i>      |
|                                                                                                                                                                                                                                      | SPU_012671                       | <i>Sp-TIR-c4</i>      |
|                                                                                                                                                                                                                                      | SPU_003608                       | <i>Sp-TIR-c5</i>      |
|                                                                                                                                                                                                                                      | SPU_013352                       | <i>Sp-TIR-c6</i>      |
|                                                                                                                                                                                                                                      | SPU_020131 (E)                   | <i>Sp-TIR-c7</i>      |
| ECSIT/SITPEC                                                                                                                                                                                                                         | SPU_012096 (E)                   | <i>Sp-Ecsit</i>       |
| Tollip                                                                                                                                                                                                                               | SPU_026252/021673 <sup>(1)</sup> | <i>Sp-Tollip</i>      |
| Genes for which no models with evident homology or similar domain structure could be found using the search criteria detailed in <i>Materials and Methods</i> : TIRAP/MAL, TICAM-1/TRIF, TICAM-2/TRAM, SIGIRR, RIG-1, spatzle, tube. |                                  |                       |
| <b>II.A3 Intracellular signal transduction - NLR signaling</b>                                                                                                                                                                       |                                  |                       |
| PEPT1/slc15a1                                                                                                                                                                                                                        | SPU_012690                       | <i>Sp-Slc15a2</i>     |
| GRIM19/Ndufa13                                                                                                                                                                                                                       | SPU_003408/024115 <sup>(1)</sup> | <i>Sp-Ndufa13</i>     |
| RIPK1/RIP and                                                                                                                                                                                                                        | SPU_005215                       | <i>SpANKRD3</i>       |
| RIPK2/RICK/CARDIAK                                                                                                                                                                                                                   | SPU_011816                       | <i>Sp-RIPK4</i>       |
| CRADD- and ASC-like                                                                                                                                                                                                                  | SPU_019893                       | <i>Sp-PAN-1</i>       |
|                                                                                                                                                                                                                                      | SPU_006410 (E)                   | <i>Sp-PAN-2</i>       |
| Caspase-1/4/5/11/12/13                                                                                                                                                                                                               | SPU_002921                       | <i>Sp-ICE-like-1a</i> |
|                                                                                                                                                                                                                                      | SPU_002923                       | <i>Sp-ICE-like-1b</i> |
|                                                                                                                                                                                                                                      | SPU_011872                       | <i>Sp-ICE-like-3</i>  |
|                                                                                                                                                                                                                                      | SPU_012722                       | <i>Sp-ICE-like-4</i>  |
|                                                                                                                                                                                                                                      | SPU_021141                       | <i>Sp-ICE-like-2</i>  |
| <b>II.B1 Intercellular signaling (Cytokines and Growth Factors) - Interleukins, Cytokines and Hematopoietins</b>                                                                                                                     |                                  |                       |
| MIF                                                                                                                                                                                                                                  | SPU_011299                       | <i>Sp-Mif-1</i>       |
|                                                                                                                                                                                                                                      | SPU_030001                       | <i>Sp-Mif-2</i>       |
|                                                                                                                                                                                                                                      | SPU_017901                       | <i>Sp-Mif-3</i>       |
|                                                                                                                                                                                                                                      | SPU_020035 (E)                   | <i>Sp-Mif-4</i>       |
|                                                                                                                                                                                                                                      | SPU_020036 (E)                   | <i>Sp-Mif-5</i>       |

(1) Two or more model IDs have been assigned to the same gene due to any of the following reasons: a) They represent duplicated models of the same gene; b) They correspond to both alleles of the same locus; c) They contain partial fragments of a gene broken up into more than one model.

(E) indicates embryonic expression of the gene model as indicated by hybridization of pooled RNA samples from egg, early blastula, gastrula and prism stage embryos to a high-density tiling array of the *S. purpuratus* genome (Samanta *et al.*, 2006)



Table S1 (cont.) - Complete list of immunity-related genes

| Gene Category                                                                                                            | Gene model ID                    | Assigned name               |
|--------------------------------------------------------------------------------------------------------------------------|----------------------------------|-----------------------------|
| <b>II.B1 Intercellular signaling (Cytokines and Growth Factors) - Interleukins, Cytokines and Hematopoietins (cont.)</b> |                                  |                             |
| MIF (cont.)                                                                                                              | SPU_016226 (E)                   | <i>Sp-Mif-6</i>             |
|                                                                                                                          | SPU_001152 (E)                   | <i>Sp-Mif-7</i>             |
|                                                                                                                          | SPU_012071                       | <i>Sp-Mif-like1</i>         |
|                                                                                                                          | SPU_019323 (E)                   | <i>Sp-Mif-like2</i>         |
| IL-1R/CD121a<br>and associated genes                                                                                     | SPU_005871 (E)                   | <i>Sp-IL1r1</i>             |
|                                                                                                                          | SPU_003911/003912 <sup>(1)</sup> | <i>Sp-IL1AP</i>             |
|                                                                                                                          | SPU_013950/000409 <sup>(1)</sup> | <i>Sp-IL1-rs1</i>           |
| Pellino                                                                                                                  | SPU_004517 (E)                   | <i>Sp-Pellino</i>           |
| IL-17                                                                                                                    | SPU_005983                       | <i>Sp-IL17-1</i>            |
|                                                                                                                          | SPU_012844                       | <i>Sp-IL17-2</i>            |
|                                                                                                                          | SPU_012845                       | <i>Sp-IL17-3</i>            |
|                                                                                                                          | SPU_019349                       | <i>Sp-IL17-4</i>            |
|                                                                                                                          | SPU_019350                       | <i>Sp-IL17-5</i>            |
|                                                                                                                          | SPU_019351                       | <i>Sp-IL17-6</i>            |
|                                                                                                                          | SPU_022838                       | <i>Sp-IL17-7</i>            |
|                                                                                                                          | SPU_027904                       | <i>Sp-IL17-8</i>            |
|                                                                                                                          | SPU_030184                       | <i>Sp-IL17-9</i>            |
|                                                                                                                          | SPU_030185                       | <i>Sp-IL17-10</i>           |
|                                                                                                                          | SPU_030186                       | <i>Sp-IL17-11</i>           |
|                                                                                                                          | SPU_030187                       | <i>Sp-IL17-12</i>           |
|                                                                                                                          | SPU_030188                       | <i>Sp-IL17-13</i>           |
|                                                                                                                          | SPU_030190                       | <i>Sp-IL17-14</i>           |
|                                                                                                                          | SPU_030191                       | <i>Sp-IL17-15</i>           |
|                                                                                                                          | SPU_030192                       | <i>Sp-IL17-16</i>           |
|                                                                                                                          | SPU_030193                       | <i>Sp-IL17-17</i>           |
|                                                                                                                          | SPU_030196                       | <i>Sp-IL17-18</i>           |
|                                                                                                                          | SPU_030197                       | <i>Sp-IL17-19</i>           |
|                                                                                                                          | SPU_030198                       | <i>Sp-IL17-20</i>           |
|                                                                                                                          | SPU_030199                       | <i>Sp-IL17-21</i>           |
| SPU_030200                                                                                                               | <i>Sp-IL17-22</i>                |                             |
| SPU_030203                                                                                                               | <i>Sp-IL17-23</i>                |                             |
| SPU_030204                                                                                                               | <i>Sp-IL17-24</i>                |                             |
| SPU_030189                                                                                                               | <i>Sp-IL17-p1</i>                |                             |
| SPU_030194                                                                                                               | <i>Sp-IL17-p2</i>                |                             |
| SPU_030195                                                                                                               | <i>Sp-IL17-p3</i>                |                             |
| SPU_030201                                                                                                               | <i>Sp-IL17-p4</i>                |                             |
| SPU_030202                                                                                                               | <i>Sp-IL17-p5</i>                |                             |
| IL-17RA/B                                                                                                                | SPU_030141                       | <i>Sp-IL17receptor-like</i> |

(1) Two or more model IDs have been assigned to the same gene due to any of the following reasons: a) They represent duplicated models of the same gene; b) They correspond to both alleles of the same locus; c) They contain partial fragments of a gene broken up into more than one model.

(E) indicates embryonic expression of the gene model as indicated by hybridization of pooled RNA samples from egg, early blastula, gastrula and prism stage embryos to a high-density tiling array of the *S. purpuratus* genome (Samanta *et al.*, 2006)

Table S1 (cont.) - Complete list of immunity-related genes

| Gene Category                                                                                                                                                                                                                                                                                                                                                                                                                                                                                                                                                                                                                                                                                                                                                                                                                                                                                                                                                                      | Gene model ID                                                                       | Assigned name                            |                |
|------------------------------------------------------------------------------------------------------------------------------------------------------------------------------------------------------------------------------------------------------------------------------------------------------------------------------------------------------------------------------------------------------------------------------------------------------------------------------------------------------------------------------------------------------------------------------------------------------------------------------------------------------------------------------------------------------------------------------------------------------------------------------------------------------------------------------------------------------------------------------------------------------------------------------------------------------------------------------------|-------------------------------------------------------------------------------------|------------------------------------------|----------------|
| <b>II.B1 Intercellular signaling (Cytokines and Growth Factors) - Interleukins, Cytokines and Hematopoietins (cont.)</b>                                                                                                                                                                                                                                                                                                                                                                                                                                                                                                                                                                                                                                                                                                                                                                                                                                                           |                                                                                     |                                          |                |
| Genes for which no models with evident homology or similar domain structure could be found using the search criteria detailed in <i>Materials and Methods</i> : IL-1a/b, IL-1R2/CD121b, IL-1R-like1, IL-2, IL-2RA/CD25, IL-2RB/CD122, IL-2Rgamma/CD132, IL-3, IL-3RA/CD123, IL-4, IL-4R/CD124, IL-5, IL-5R/CD125, IL-6, IL-6RA/CD126, IL-6ST/CD130/gp130, IL-7, IL-7RA/CD127, IL-8/CXCL8, IL-8RA/B, IL-9, IL-9R, IL-10RA, IL-10RB, IL-11, IL-11R/CD130, IL-12a/b, IL-12Rbeta1, IL-13, IL-13RA, IL-15, IL-16, IL-18, IL-18R, IL-19, IL-20, IL-20RA, IL-21, IL-21R, IL-22, IL-22RA, IL-23, IL-23R, IL-24, IL-26, IL-27, IL-27RA/WSX-1, IL-28, IL-28RA, IL-29, OSM, LIF, OSMR/LIFR, CSF1/M-CSF, CSF2/GM-CSF, CSF3/G-CSF, CSFR, INF-alpha/beta/gamma/kappa/omega/zeta, IFNR1/2, Epo, EpoR, CXCL1(ELR+) family [CXCL1,2,3,5,6,7,8,14,15], CXCR1/IL-8RA, CXCR2/IL-8RB, CXCL(ELR-) family [CXCL4,9,10,11,12,13,16], CXCR3-6, CCL family [CCL1-28], CCR1-10, XCL1/2, XCR1, CX3CL1, CX3CR1. |                                                                                     |                                          |                |
| <b>II.B2 Intercellular signaling (Cytokines and Growth Factors) - TNF pathway</b>                                                                                                                                                                                                                                                                                                                                                                                                                                                                                                                                                                                                                                                                                                                                                                                                                                                                                                  |                                                                                     |                                          |                |
| TNF Superfamily                                                                                                                                                                                                                                                                                                                                                                                                                                                                                                                                                                                                                                                                                                                                                                                                                                                                                                                                                                    | SPU_009527                                                                          | <i>Sp-Tnfsf_like2</i>                    |                |
|                                                                                                                                                                                                                                                                                                                                                                                                                                                                                                                                                                                                                                                                                                                                                                                                                                                                                                                                                                                    | SPU_009528                                                                          | <i>Sp-Tnfsf_like1</i>                    |                |
|                                                                                                                                                                                                                                                                                                                                                                                                                                                                                                                                                                                                                                                                                                                                                                                                                                                                                                                                                                                    | SPU_015654                                                                          | <i>Sp-Tnfsf_like3</i>                    |                |
|                                                                                                                                                                                                                                                                                                                                                                                                                                                                                                                                                                                                                                                                                                                                                                                                                                                                                                                                                                                    | SPU_030072                                                                          | <i>Sp-Tnfsf_like4</i>                    |                |
| TNFR Superfamily                                                                                                                                                                                                                                                                                                                                                                                                                                                                                                                                                                                                                                                                                                                                                                                                                                                                                                                                                                   | SPU_012211                                                                          | <i>Sp-Tnfrsf1a</i>                       |                |
|                                                                                                                                                                                                                                                                                                                                                                                                                                                                                                                                                                                                                                                                                                                                                                                                                                                                                                                                                                                    | SPU_010180                                                                          | <i>Sp-Tnfrsf_cl1</i>                     |                |
|                                                                                                                                                                                                                                                                                                                                                                                                                                                                                                                                                                                                                                                                                                                                                                                                                                                                                                                                                                                    | SPU_010230                                                                          | <i>Sp-Tnfrsf_like1</i>                   |                |
|                                                                                                                                                                                                                                                                                                                                                                                                                                                                                                                                                                                                                                                                                                                                                                                                                                                                                                                                                                                    | SPU_018915                                                                          | <i>Sp-Tnfrsf_like1</i>                   |                |
|                                                                                                                                                                                                                                                                                                                                                                                                                                                                                                                                                                                                                                                                                                                                                                                                                                                                                                                                                                                    | SPU_020740                                                                          | <i>Sp-Eda2r_like1 / Tnfrsf27-like1</i>   |                |
|                                                                                                                                                                                                                                                                                                                                                                                                                                                                                                                                                                                                                                                                                                                                                                                                                                                                                                                                                                                    | SPU_020955                                                                          | <i>Sp-Tnfrsf_like2</i>                   |                |
|                                                                                                                                                                                                                                                                                                                                                                                                                                                                                                                                                                                                                                                                                                                                                                                                                                                                                                                                                                                    | SPU_024584                                                                          | <i>Sp-Eda2r_like2 / Tnfrsf27-like2</i>   |                |
|                                                                                                                                                                                                                                                                                                                                                                                                                                                                                                                                                                                                                                                                                                                                                                                                                                                                                                                                                                                    | SPU_026216 (E)                                                                      | <i>Sp-Tnfrsf_cl2</i>                     |                |
|                                                                                                                                                                                                                                                                                                                                                                                                                                                                                                                                                                                                                                                                                                                                                                                                                                                                                                                                                                                    | FADD                                                                                | SPU_010777                               | <i>Sp-FADD</i> |
|                                                                                                                                                                                                                                                                                                                                                                                                                                                                                                                                                                                                                                                                                                                                                                                                                                                                                                                                                                                    | <b>II.B3 Intercellular signaling (Cytokines and Growth Factors) - RTK signaling</b> |                                          |                |
| Tie1/2                                                                                                                                                                                                                                                                                                                                                                                                                                                                                                                                                                                                                                                                                                                                                                                                                                                                                                                                                                             | SPU_024044 (E)                                                                      | <i>Sp-Tie1/2</i>                         |                |
| Flk-1/Flt-1/Flt-4<br>(VEGFR-3)                                                                                                                                                                                                                                                                                                                                                                                                                                                                                                                                                                                                                                                                                                                                                                                                                                                                                                                                                     | SPU_000310 (E)                                                                      | <i>Sp-PDGFR/VEGFR-like / Sp-VEGFR-10</i> |                |
|                                                                                                                                                                                                                                                                                                                                                                                                                                                                                                                                                                                                                                                                                                                                                                                                                                                                                                                                                                                    | SPU_021021 (E)                                                                      | <i>Sp-PDGFR/VEGFR-like / Sp-VEGFR-7</i>  |                |
| VEGF                                                                                                                                                                                                                                                                                                                                                                                                                                                                                                                                                                                                                                                                                                                                                                                                                                                                                                                                                                               | SPU_014978                                                                          | <i>Sp-VEGF-1</i>                         |                |
|                                                                                                                                                                                                                                                                                                                                                                                                                                                                                                                                                                                                                                                                                                                                                                                                                                                                                                                                                                                    | SPU_005737                                                                          | <i>Sp-VEGF-2</i>                         |                |
|                                                                                                                                                                                                                                                                                                                                                                                                                                                                                                                                                                                                                                                                                                                                                                                                                                                                                                                                                                                    | SPU_030148                                                                          | <i>Sp-VEGF-3</i>                         |                |
| Genes for which no models with evident homology or similar domain structure could be found using the search criteria detailed in <i>Materials and Methods</i> : Angiopoietins 1-4, CSFR/MCSFR, CSF1-3, c-Kit, SCF/KITL, PDGF, CD34, FLT3/CD135/FLK2.                                                                                                                                                                                                                                                                                                                                                                                                                                                                                                                                                                                                                                                                                                                               |                                                                                     |                                          |                |
| <b>II.B4 Intercellular signaling (Cytokines and Growth Factors) - Cytoplasmic adaptors and signal transducers</b>                                                                                                                                                                                                                                                                                                                                                                                                                                                                                                                                                                                                                                                                                                                                                                                                                                                                  |                                                                                     |                                          |                |
| IRAK                                                                                                                                                                                                                                                                                                                                                                                                                                                                                                                                                                                                                                                                                                                                                                                                                                                                                                                                                                               | SPU_000073 (E)                                                                      | <i>Sp-Pik1(Pelle/Trak1).</i>             |                |
|                                                                                                                                                                                                                                                                                                                                                                                                                                                                                                                                                                                                                                                                                                                                                                                                                                                                                                                                                                                    | SPU_028724 (E)                                                                      | <i>Sp-Pik2(Pelle/Trak2).</i>             |                |
| (1) Two or more model IDs have been assigned to the same gene due to any of the following reasons: a) They represent duplicated models of the same gene; b) They correspond to both alleles of the same locus; c) They contain partial fragments of a gene broken up into more than one model.                                                                                                                                                                                                                                                                                                                                                                                                                                                                                                                                                                                                                                                                                     |                                                                                     |                                          |                |
| (E) indicates embryonic expression of the gene model as indicated by hybridization of pooled RNA samples from egg, early blastula, gastrula and prism stage embryos to a high-density tiling array of the <i>S. purpuratus</i> genome (Samanta <i>et al.</i> , 2006)                                                                                                                                                                                                                                                                                                                                                                                                                                                                                                                                                                                                                                                                                                               |                                                                                     |                                          |                |

Table S1 (cont.) - Complete list of immunity-related genes

| Gene Category                                                                                                             | Gene model ID                        | Assigned name                                                  |
|---------------------------------------------------------------------------------------------------------------------------|--------------------------------------|----------------------------------------------------------------|
| <b>II.B4 Intercellular signaling (Cytokines and Growth Factors) - Cytoplasmic adaptors and signal transducers (cont.)</b> |                                      |                                                                |
| JAKs                                                                                                                      | SPU_030066                           | <i>Sp-Jak</i>                                                  |
|                                                                                                                           | SPU_022495 (E)                       | <i>SpJAK2</i>                                                  |
| SOCS                                                                                                                      | SPU_002792 (E)                       | <i>Sp-SOCS2/3</i>                                              |
|                                                                                                                           | SPU_026496 (E)                       | <i>Sp-SOCS4/5</i>                                              |
|                                                                                                                           | SPU_011298                           | <i>Sp-Socs6-like</i>                                           |
|                                                                                                                           | SPU_010245                           | <i>Sp-Socs7</i>                                                |
| PIAS                                                                                                                      | SPU_007964 (E)                       | <i>Sp-Pias1</i>                                                |
|                                                                                                                           | SPU_011690 (E)                       | <i>Sp-Pias2/3</i>                                              |
| Src Family Kinases (SFKs)                                                                                                 | SPU_013522/023261 <sup>(1)</sup> (E) | <i>Sp-SFK1</i>                                                 |
|                                                                                                                           | SPU_024525 (E)                       | <i>Sp-SFK2</i>                                                 |
|                                                                                                                           | SPU_005419 (E)                       | <i>Sp-SFK3</i>                                                 |
|                                                                                                                           | SPU_012805                           | <i>Sp-SFK4</i>                                                 |
|                                                                                                                           | SPU_014473/026766 <sup>(1)</sup>     | <i>SpYes-related kinase</i>                                    |
| Abl                                                                                                                       | SPU_023952 (E)                       | <i>Sp-Abl</i>                                                  |
| Syk/ZAP-70                                                                                                                | SPU_006988 (E)                       | <i>Sp-Syk/ZAP70</i>                                            |
| WASP                                                                                                                      | SPU_003194 (E)                       | <i>Sp-similar to Wiskott-Aldrich syndrome putative homolog</i> |
| SH2-B                                                                                                                     | SPU_027685 (E)                       | <i>Sp-SH2-B-rs1</i>                                            |
| SHP-1/2                                                                                                                   | SPU_013810 (E)                       | <i>Sp-Ptpn11</i>                                               |
| FKBP-12                                                                                                                   | SPU_027840 (E)                       | <i>Sp-FKBP-12</i>                                              |
| Nck                                                                                                                       | SPU_014752 (E)                       | <i>Sp-Nck</i>                                                  |

Genes for which no models with evident homology or similar domain structure could be found using the search criteria detailed in *Materials and Methods*: APS, NFAM1, Par-4, SLP-76, Sik/Brk/PTK6, Eif2ak2/Pkr.

### III. COAGULATION and WOUND REPAIR

| Gene Category                          | Gene model ID                    | Assigned name                   |
|----------------------------------------|----------------------------------|---------------------------------|
| <b>III.a Coagulation cascade genes</b> |                                  |                                 |
| CF5/8                                  | SPU_021228                       | <i>Sp-Cf5/8-like1</i>           |
|                                        | SPU_021229                       | <i>Sp-Cf5/8-like2</i>           |
| CF13                                   | SPU_005702 (E)                   | <i>Sp-transglutaminase-like</i> |
| TFPI                                   | SPU_030138 (E)                   | <i>Sp-Tfpi-like</i>             |
| Plasminogen                            | SPU_022934                       | <i>Sp-Plasminogen-like 1</i>    |
|                                        | SPU_014730/014731 <sup>(1)</sup> | <i>Sp-Plasminogen-like 2</i>    |
|                                        | SPU_005414                       | <i>Sp-Plasminogen-like 3</i>    |
|                                        | SPU_000633                       | <i>Sp-Plasminogen-related 1</i> |

(1) Two or more model IDs have been assigned to the same gene due to any of the following reasons: a) They represent duplicated models of the same gene; b) They correspond to both alleles of the same locus; c) They contain partial fragments of a gene broken up into more than one model.

(E) indicates embryonic expression of the gene model as indicated by hybridization of pooled RNA samples from egg, early blastula, gastrula and prism stage embryos to a high-density tiling array of the *S. purpuratus* genome (Samanta *et al.*, 2006)

Table S1 (cont.) - Complete list of immunity-related genes

| Gene Category                                  | Gene model ID  | Assigned name            |
|------------------------------------------------|----------------|--------------------------|
| <b>III.a Coagulation cascade genes (cont.)</b> |                |                          |
| Serpins                                        | SPU_028469 (E) | <i>Sp-serpin-like 1</i>  |
| (All Sp-serpin-like models                     | SPU_009346     | <i>Sp-serpin-like 2</i>  |
| Blast back to the B clade                      | SPU_013377 (E) | <i>Sp-serpin-like 3</i>  |
| of mammalian serpins).                         | SPU_013378 (E) | <i>Sp-serpin-like 4</i>  |
|                                                | SPU_018632     | <i>Sp-serpin-like 5</i>  |
|                                                | SPU_018631     | <i>Sp-serpin-like 6</i>  |
|                                                | SPU_018630     | <i>Sp-serpin-like 7</i>  |
|                                                | SPU_018196     | <i>Sp-serpin-like 8</i>  |
|                                                | SPU_024263     | <i>Sp-serpin-like 9</i>  |
|                                                | SPU_004543     | <i>Sp-serpin-like 10</i> |
|                                                | SPU_002711     | <i>Sp-serpin-like 11</i> |
|                                                | SPU_020278     | <i>Sp-serpin-like 12</i> |
| Plasma Kallikrein B1                           | SPU_012390 (E) | <i>Sp-Klkb1</i>          |
|                                                | SPU_015878     | <i>Sp-Klkb1-like1</i>    |
| Alpha-2-Macroglobulin                          | SPU_011257 (E) | <i>Sp-A2M</i>            |

Genes for which no models with evident homology or similar domain structure could be found using the search criteria detailed *Materials and Methods*: CF2/Thrombin, CF2R, CF3/Tissue factor, CF7, CF9, CF10, CF11, CF12, von Willebrand Factor, Bradykinin Receptor B1/2, Kininogen 1/2, Fibrinogen A alpha, Thrombomodulin, Protein C, Protein S, PLAT, PLAU, PLAU/CD87, Plasma carboxypeptidase B2, Horseshoe crab clotting (Tt) factor G alpha/beta.

**III.b Sea urchin clotting genes**

|                 |                |                                    |
|-----------------|----------------|------------------------------------|
| Amassin         | SPU_003389     | <i>Sp-OLF-like/Sp-amassin-like</i> |
|                 | SPU_006531     | <i>Sp-OLF/Sp-amassin1</i>          |
|                 | SPU_021526 (E) | <i>Sp-amassin</i>                  |
| Amassin (cont.) | SPU_023924     | <i>Sp-OLF/Sp-amassin2</i>          |
|                 | SPU_023926     | <i>Sp-amassin2</i>                 |
|                 | SPU_026884     | <i>Sp-OLF/Sp-amassin3</i>          |

**IV. MISCELLANEOUS**

| Gene                  | Gene model ID  | Assigned name        |
|-----------------------|----------------|----------------------|
| CD109                 | SPU_024565 (E) | <i>Sp-CD109-like</i> |
| Serum amyloid protein | SPU_012667     | <i>Sp-Saa-a</i>      |
|                       | SPU_012668     | <i>Sp-Saa-b</i>      |
| CD45                  | SPU_021599 (E) | <i>Sp-PTPR1</i>      |

(1) Two or more model IDs have been assigned to the same gene due to any of the following reasons: a) They represent duplicated models of the same gene; b) They correspond to both alleles of the same locus; c) They contain partial fragments of a gene broken up into more than one model.

(E) indicates embryonic expression of the gene model as indicated by hybridization of pooled RNA samples from egg, early blastula, gastrula and prism stage embryos to a high-density tiling array of the *S. purpuratus* genome (Samanta *et al.*, 2006)

Supplementary Table S2. Full categorized list of TLR genes in the *Strongylocentrotus purpuratus* genome.

| Cluster  | Gene name        | Gene ID    | Domain Structure *           | Status   |
|----------|------------------|------------|------------------------------|----------|
| Group IA | <i>Sp-Tlr003</i> | SPU_000199 | SP-NT-LRR(22)-CT-TM-TIR      | complete |
|          | <i>Sp-Tlr008</i> | SPU_000911 | SP-NT-LRR(22)-CT-TM-TIR      | complete |
|          | <i>Sp-Tlr010</i> | SPU_001877 | SP-NT-LRR(22)-CT-TM-TIR      | complete |
|          | <i>Sp-Tlr019</i> | SPU_004139 | SP-NT-LRR(22)-CT-TM-TIR      | complete |
|          | <i>Sp-Tlr020</i> | SPU_004150 | SP-NT-LRR(22)-CT-TM-TIR      | complete |
|          | <i>Sp-Tlr030</i> | SPU_005950 | SP-NT-LRR(22)-CT-TM-TIR      | complete |
|          | <i>Sp-Tlr050</i> | SPU_009037 | SP-NT-LRR(22)-CT-TM-TIR      | complete |
|          | <i>Sp-Tlr058</i> | SPU_010695 | SP-NT-LRR(22)-CT-TM-TIR      | complete |
|          | <i>Sp-Tlr060</i> | SPU_011454 | SP-NT-LRR(22)-CT-TM-TIR      | complete |
|          | <i>Sp-Tlr062</i> | SPU_011537 | SP-NT-LRR(22)-CT-TM-TIR      | complete |
|          | <i>Sp-Tlr063</i> | SPU_011539 | SP-NT-LRR(22)-CT-TM-TIR      | complete |
|          | <i>Sp-Tlr064</i> | SPU_011540 | SP-NT-LRR(22)-CT-TM-TIR      | complete |
|          | <i>Sp-Tlr067</i> | SPU_011949 | SP-NT-LRR(22)-CT-TM-TIR      | complete |
|          | <i>Sp-Tlr079</i> | SPU_015029 | SP-NT-LRR(22)-CT-TM-TIR      | complete |
|          | <i>Sp-Tlr080</i> | SPU_015066 | SP-NT-LRR(22)-CT-TM-TIR      | complete |
|          | <i>Sp-Tlr082</i> | SPU_015303 | SP-NT-LRR(22)-CT-TM-TIR      | complete |
|          | <i>Sp-Tlr091</i> | SPU_018100 | SP-NT-LRR(22)-CT-TM-TIR      | complete |
|          | <i>Sp-Tlr103</i> | SPU_019309 | SP-NT-LRR(22)-CT-TM-TIR      | complete |
|          | <i>Sp-Tlr140</i> | SPU_025719 | SP-NT-LRR(22)-CT-TM-TIR      | complete |
|          | <i>Sp-Tlr061</i> | SPU_011536 | SP-NT-LRR(22)-CT-(XXX)-TIR   | partial  |
|          | <i>Sp-Tlr083</i> | SPU_015533 | SP-NT-LRR(22)-CT-TM-TIR(XXX) | partial  |
|          | <i>Sp-Tlr098</i> | SPU_018519 | SP-NT-LRR(22)-CT-TM-TIR(XXX) | partial  |
|          | <i>Sp-Tlr102</i> | SPU_019042 | SP-NT-LRR(22)-(XXX)-TIR      | partial  |
|          | <i>Sp-Tlr138</i> | SPU_025263 | (XXX)-LRR(9)-CT-TM-TIR       | partial  |
|          | <i>Sp-Tlr139</i> | SPU_025312 | SP-NT-LRR(21)-(XXX)-TIR      | partial  |
|          | <i>Sp-Tlr160</i> | SPU_001650 | (XXX)-TIR                    | partial  |
|          | <i>Sp-Tlr175</i> | SPU_009952 | (XXX)-TIR                    | partial  |
|          | <i>Sp-Tlr179</i> | SPU_011277 | (XXX)-TIR                    | partial  |
|          | <i>Sp-Tlr181</i> | SPU_011455 | (XXX)-TM-TIR                 | partial  |
|          | <i>Sp-Tlr187</i> | SPU_030080 | (XXX)-LRR(3)-CT-TM-TIR       | partial  |
|          | <i>Sp-Tlr210</i> | SPU_030094 | (XXX)-CT-TM-TIR(XXX)         | partial  |
|          | <i>Sp-Tlr212</i> | SPU_021502 | (XXX)-TIR                    | partial  |
|          | <i>Sp-Tlr213</i> | SPU_021907 | (XXX)-CT-TM-TIR              | partial  |
|          | <i>Sp-Tlr214</i> | SPU_021908 | (XXX)-TIR                    | partial  |
|          | <i>Sp-Tlr215</i> | SPU_030137 | (XXX)-LRR(5)-CT-TM-TIR(XXX)  | partial  |
|          | <i>Sp-Tlr224</i> | SPU_030076 | (XXX)-LRR(3)-CT-TM-TIR       | partial  |
|          | <i>Sp-Tlr227</i> | SPU_030079 | (XXX)-LRR(2)-CT-TM-TIR       | partial  |
|          | <i>Sp-Tlr024</i> | SPU_004957 |                              | pseudo   |

\* Domain Structure: SP = Signal Peptide; LRR = Leucine-Rich Repeat; NT = N-terminal type LRR; CT = C-terminal type LRR; TM = Transmembrane domain; TIR = Toll/IL-1R domain; (XXX) Predicted missing sequence.

Table S2 (cont.) - Full list of TLR genes.

| Cluster                    | Gene name        | Gene ID    | Domain Structure *      | Status   |
|----------------------------|------------------|------------|-------------------------|----------|
| <b>Group IA</b><br>(cont.) | <i>Sp-Tlr040</i> | SPU_007850 |                         | pseudo   |
|                            | <i>Sp-Tlr057</i> | SPU_010619 |                         | pseudo   |
|                            | <i>Sp-Tlr059</i> | SPU_010940 |                         | pseudo   |
|                            | <i>Sp-Tlr073</i> | SPU_013751 |                         | pseudo   |
|                            | <i>Sp-Tlr114</i> | SPU_021936 |                         | pseudo   |
|                            | <i>Sp-Tlr121</i> | SPU_023544 |                         | pseudo   |
|                            | <i>Sp-Tlr141</i> | SPU_009450 |                         | pseudo   |
|                            | <i>Sp-Tlr151</i> | SPU_027798 |                         | pseudo   |
|                            | <i>Sp-Tlr206</i> | SPU_020652 |                         | pseudo   |
|                            | <i>Sp-Tlr207</i> | SPU_020654 |                         | pseudo   |
| <i>Sp-Tlr220</i>           | SPU_027735       |            | pseudo                  |          |
| <b>Group IB</b>            | <i>Sp-Tlr015</i> | SPU_002538 | SP-NT-LRR(22)-CT-TM-TIR | complete |
|                            | <i>Sp-Tlr031</i> | SPU_006164 | SP-NT-LRR(23)-CT-TM-TIR | complete |
|                            | <i>Sp-Tlr035</i> | SPU_007105 | SP-NT-LRR(25)-CT-TM-TIR | complete |
|                            | <i>Sp-Tlr048</i> | SPU_008962 | SP-NT-LRR(22)-CT-TM-TIR | complete |
|                            | <i>Sp-Tlr049</i> | SPU_008963 | SP-NT-LRR(22)-CT-TM-TIR | complete |
|                            | <i>Sp-Tlr069</i> | SPU_012464 | SP-NT-LRR(24)-CT-TM-TIR | complete |
|                            | <i>Sp-Tlr075</i> | SPU_014041 | SP-NT-LRR(22)-CT-TM-TIR | complete |
|                            | <i>Sp-Tlr077</i> | SPU_014191 | SP-NT-LRR(24)-CT-TM-TIR | complete |
|                            | <i>Sp-Tlr134</i> | SPU_024868 | SP-NT-LRR(24)-CT-TM-TIR | complete |
|                            | <i>Sp-Tlr174</i> | SPU_009933 | SP-NT-LRR(22)-CT-TM-TIR | complete |
|                            | <i>Sp-Tlr203</i> | SPU_020258 | SP-NT-LRR(24)-CT-TM-TIR | complete |
|                            | <i>Sp-Tlr205</i> | SPU_020644 | SP-NT-LRR(22)-CT-TM-TIR | complete |
|                            | <i>Sp-Tlr001</i> | SPU_030092 | (XXX)-CT-TM-TIR         | partial  |
|                            | <i>Sp-Tlr192</i> | SPU_015553 | (XXX)-TIR               | partial  |
|                            | <i>Sp-Tlr201</i> | SPU_019661 | (XXX)-TIR               | partial  |
| <i>Sp-Tlr105</i>           | SPU_020259       |            | pseudo                  |          |
| <b>Group IC</b>            | <i>Sp-Tlr029</i> | SPU_005850 | SP-NT-LRR(22)-CT-TM-TIR | complete |
|                            | <i>Sp-Tlr037</i> | SPU_007429 | SP-NT-LRR(22)-CT-TM-TIR | complete |
|                            | <i>Sp-Tlr065</i> | SPU_011570 | SP-NT-LRR(22)-CT-TM-TIR | complete |
|                            | <i>Sp-Tlr123</i> | SPU_024204 | SP-NT-LRR(22)-CT-TM-TIR | complete |
|                            | <i>Sp-Tlr124</i> | SPU_024205 | SP-NT-LRR(22)-CT-TM-TIR | complete |
|                            | <i>Sp-Tlr126</i> | SPU_024208 | SP-NT-LRR(22)-CT-TM-TIR | complete |
|                            | <i>Sp-Tlr002</i> | SPU_030093 | (XXX)-CT-TM-TIR         | partial  |
|                            | <i>Sp-Tlr163</i> | SPU_002803 | (XXX)-TM-TIR            | partial  |
|                            | <i>Sp-Tlr195</i> | SPU_016554 | (XXX)-TIR               | partial  |
|                            | <i>Sp-Tlr218</i> | SPU_024590 | (XXX)-TIR               | partial  |
|                            | <i>Sp-Tlr038</i> | SPU_007430 |                         | pseudo   |

\* Domain Structure: SP = Signal Peptide; LRR = Leucine-Rich Repeat; NT = N-terminal type LRR; CT = C-terminal type LRR; TM = Transmembrane domain; TIR = Toll/IL-1R domain; (XXX) Predicted missing sequence.

Table S2 (cont.) - Full list of TLR genes.

| Cluster                    | Gene name        | Gene ID    | Domain Structure *            | Status   |
|----------------------------|------------------|------------|-------------------------------|----------|
| <b>Group IC</b><br>(cont.) | <i>Sp-Tlr115</i> | SPU_022451 |                               | pseudo   |
|                            | <i>Sp-Tlr125</i> | SPU_024207 |                               | pseudo   |
| <b>Group ID</b>            | <i>Sp-Tlr087</i> | SPU_016536 | SP-NT-LRR(22)-CT-TM-TIR       | complete |
|                            | <i>Sp-Tlr156</i> | SPU_028893 | SP-NT-LRR(22)-CT-TM-TIR       | complete |
|                            | <i>Sp-Tlr157</i> | SPU_000375 | SP-NT-LRR(22)-CT-TM-TIR       | complete |
|                            | <i>Sp-Tlr200</i> | SPU_018380 | SP-NT-LRR(22)-CT-TM-TIR       | complete |
|                            | <i>Sp-Tlr137</i> | SPU_025136 | (XXX) LRR(19)-CT-TM-TIR(XXX)  | partial  |
|                            | <i>Sp-Tlr165</i> | SPU_003846 | (XXX)-TIR                     | partial  |
|                            | <i>Sp-Tlr173</i> | SPU_009459 | (XXX)-TIR(XXX)                | partial  |
|                            | <i>Sp-Tlr193</i> | SPU_016388 | (XXX)-TIR                     | partial  |
|                            | <i>Sp-Tlr216</i> | SPU_023491 | (XXX)-LRR(4)-CT-TM-TIR        | partial  |
|                            | <i>Sp-Tlr217</i> | SPU_024501 | (XXX)-LRR(1)-CT-TM-TIR        | partial  |
|                            | <i>Sp-Tlr135</i> | SPU_024960 |                               | pseudo   |
|                            | <i>Sp-Tlr208</i> | SPU_020741 |                               | pseudo   |
| <b>Group IE</b>            | <i>Sp-Tlr021</i> | SPU_004311 | SP-NT-LRR(22)-CT-TM-TIR       | complete |
|                            | <i>Sp-Tlr078</i> | SPU_014266 | SP-NT-LRR(22)-CT-TM-TIR       | complete |
|                            | <i>Sp-Tlr127</i> | SPU_024385 | SP-NT-LRR(22)-CT-TM-TIR       | complete |
|                            | <i>Sp-Tlr130</i> | SPU_024429 | SP-NT-LRR(22)-CT-TM-TIR       | complete |
|                            | <i>Sp-Tlr042</i> | SPU_007986 | SP-NT-LRR(11)-(XXX)-TIR       | partial  |
|                            | <i>Sp-Tlr128</i> | SPU_024386 |                               | pseudo   |
|                            | <i>Sp-Tlr152</i> | SPU_027815 |                               | pseudo   |
| <b>Group I</b><br>(Orphan) | <i>Sp-Tlr014</i> | SPU_002442 | SP-NT-LRR(22)-CT-TM-TIR       | complete |
|                            | <i>Sp-Tlr052</i> | SPU_009173 | SP-NT-LRR(22)-CT-TM-TIR       | complete |
|                            | <i>Sp-Tlr089</i> | SPU_017529 | SP-NT-LRR(22)-CT-TM-TIR       | complete |
|                            | <i>Sp-Tlr120</i> | SPU_023321 | SP-NT-LRR(22)-CT-TM-TIR       | complete |
|                            | <i>Sp-Tlr150</i> | SPU_027721 | SP-NT-LRR(22)-CT-TM-TIR       | complete |
|                            | <i>Sp-Tlr154</i> | SPU_028576 | SP-NT-LRR(22)-CT-TM-TIR       | complete |
|                            | <i>Sp-Tlr197</i> | SPU_017530 | SP-NT-LRR(22)-CT-TM-TIR       | complete |
|                            | <i>Sp-Tlr054</i> | SPU_009829 | SP-NT-LRR(15)-(XXX)-CT-TM-TIR | partial  |
|                            | <i>Sp-Tlr178</i> | SPU_010693 | (XXX)-LRR(3)-CT-TM-TIR        | partial  |
|                            | <i>Sp-Tlr018</i> | SPU_003684 |                               | pseudo   |
|                            | <i>Sp-Tlr153</i> | SPU_028404 |                               | pseudo   |
|                            | <i>Sp-Tlr166</i> | SPU_004655 |                               | pseudo   |
| <b>Group IIA</b>           | <i>Sp-Tlr007</i> | SPU_000871 | SP-NT-LRR(24)-CT-TM-TIR       | complete |
|                            | <i>Sp-Tlr013</i> | SPU_002224 | SP-NT-LRR(24)-CT-TM-TIR       | complete |
|                            | <i>Sp-Tlr025</i> | SPU_005088 | SP-NT-LRR(24)-CT-TM-TIR       | complete |
|                            | <i>Sp-Tlr033</i> | SPU_006458 | SP-NT-LRR(24)-CT-TM-TIR       | complete |
|                            | <i>Sp-Tlr047</i> | SPU_008456 | SP-NT-LRR(24)-CT-TM-TIR       | complete |

\* Domain Structure: SP = Signal Peptide; LRR = Leucine-Rich Repeat; NT = N-terminal type LRR; CT = C-terminal type LRR; TM = Transmembrane domain; TIR = Toll/IL-1R domain; (XXX) Predicted missing sequence.

Table S2 (cont.) - Full list of TLR genes.

| Cluster                     | Gene name        | Gene ID    | Domain Structure *         | Status   |
|-----------------------------|------------------|------------|----------------------------|----------|
| <b>Group IIA</b><br>(cont.) | <i>Sp-Tlr074</i> | SPU_013824 | SP-NT-LRR(24)-CT-TM-TIR    | complete |
|                             | <i>Sp-Tlr088</i> | SPU_017180 | SP-NT-LRR(24)-CT-TM-TIR    | complete |
|                             | <i>Sp-Tlr099</i> | SPU_018534 | SP-NT-LRR(24)-CT-TM-TIR    | complete |
|                             | <i>Sp-Tlr110</i> | SPU_021395 | SP-NT-LRR(24)-CT-TM-TIR    | complete |
|                             | <i>Sp-Tlr142</i> | SPU_026200 | SP-NT-LRR(24)-CT-TM-TIR    | complete |
|                             | <i>Sp-Tlr145</i> | SPU_027162 | SP-NT-LRR(24)-CT-TM-TIR    | complete |
|                             | <i>Sp-Tlr147</i> | SPU_027164 | SP-NT-(XXX)-LRR(21)-TM-TIR | partial  |
|                             | <i>Sp-Tlr086</i> | SPU_016501 |                            | pseudo   |
|                             | <i>Sp-Tlr006</i> | SPU_000870 |                            | pseudo   |
|                             | <i>Sp-Tlr032</i> | SPU_006218 |                            | pseudo   |
|                             | <i>Sp-Tlr146</i> | SPU_027163 |                            | pseudo   |
| <b>Group IIB</b>            | <i>Sp-Tlr004</i> | SPU_000428 | SP-NT-LRR(23)-CT-TM-TIR    | complete |
|                             | <i>Sp-Tlr022</i> | SPU_004360 | SP-NT-LRR(23)-CT-TM-TIR    | complete |
|                             | <i>Sp-Tlr023</i> | SPU_004791 | SP-NT-LRR(23)-CT-TM-TIR    | complete |
|                             | <i>Sp-Tlr026</i> | SPU_005339 | SP-NT-LRR(23)-CT-TM-TIR    | complete |
|                             | <i>Sp-Tlr111</i> | SPU_021415 | SP-NT-LRR(23)-CT-TM-TIR    | complete |
|                             | <i>Sp-Tlr132</i> | SPU_024733 | SP-NT-LRR(23)-CT-TM-TIR    | complete |
|                             | <i>Sp-Tlr167</i> | SPU_004792 | SP-NT-LRR(23)-CT-TM-TIR    | complete |
|                             | <i>Sp-Tlr169</i> | SPU_005148 | SP-NT-LRR(23)-CT-TM-TIR    | complete |
|                             | <i>Sp-Tlr036</i> | SPU_007418 | (XXX)-LRR(5)-CT-TM-TIR     | partial  |
|                             | <i>Sp-Tlr034</i> | SPU_006939 |                            | pseudo   |
|                             | <i>Sp-Tlr204</i> | SPU_020428 |                            | pseudo   |
| <i>Sp-Tlr109</i>            | SPU_021225       |            | pseudo                     |          |
| <b>Group IIIA</b>           | <i>Sp-Tlr005</i> | SPU_000615 | SP-NT-LRR(23)-CT-TM-TIR    | complete |
|                             | <i>Sp-Tlr053</i> | SPU_009435 | SP-NT-LRR(23)-CT-TM-TIR    | complete |
|                             | <i>Sp-Tlr068</i> | SPU_012257 | SP-NT-LRR(23)-CT-TM-TIR    | complete |
|                             | <i>Sp-Tlr085</i> | SPU_016468 | SP-NT-LRR(23)-CT-TM-TIR    | complete |
|                             | <i>Sp-Tlr108</i> | SPU_021162 | SP-NT-LRR(23)-CT-TM-TIR    | complete |
|                             | <i>Sp-Tlr112</i> | SPU_021420 | SP-NT-LRR(23)-CT-TM-TIR    | complete |
|                             | <i>Sp-Tlr119</i> | SPU_023035 | SP-NT-LRR(23)-CT-TM-TIR    | complete |
|                             | <i>Sp-Tlr161</i> | SPU_001862 | SP-NT-LRR(23)-CT-TM-TIR    | complete |
|                             | <i>Sp-Tlr168</i> | SPU_004951 | SP-NT-LRR(23)-CT-TM-TIR    | complete |
|                             | <i>Sp-Tlr171</i> | SPU_008229 | SP-NT-LRR(23)-CT-TM-TIR    | complete |
|                             | <i>Sp-Tlr182</i> | SPU_011481 | SP-NT-LRR(23)-CT-TM-TIR    | complete |
|                             | <i>Sp-Tlr194</i> | SPU_016438 | SP-NT-LRR(23)-CT-TM-TIR    | complete |
|                             | <i>Sp-Tlr211</i> | SPU_021362 | SP-NT-LRR(23)-CT-TM-TIR    | complete |
|                             | <i>Sp-Tlr219</i> | SPU_024847 | SP-NT-LRR(23)-CT-TM-TIR    | complete |
|                             | <i>Sp-Tlr222</i> | SPU_024479 | SP-NT-LRR(23)-CT-TM-TIR    | complete |

\* Domain Structure: SP = Signal Peptide; LRR = Leucine-Rich Repeat; NT = N-terminal type LRR; CT = C-terminal type LRR; TM = Transmembrane domain; TIR = Toll/IL-1R domain; (XXX) Predicted missing sequence.



Table S2 (cont.) - Full list of TLR genes.

| Cluster                      | Gene name        | Gene ID          | Domain Structure *           | Status                  |
|------------------------------|------------------|------------------|------------------------------|-------------------------|
| <b>Group IIIA</b><br>(cont.) | <i>Sp-Tlr051</i> | SPU_009129       | (XXX)-TIR                    | partial                 |
|                              | <i>Sp-Tlr136</i> | SPU_025076       | (XXX)-LRR(1)-CT-TM-TIR       | partial                 |
|                              | <i>Sp-Tlr158</i> | SPU_000986       | (XXX)-LRR(4)-CT-TM-TIR(XXX)  | partial                 |
|                              | <i>Sp-Tlr162</i> | SPU_001993       | (XXX)-TM-TIR                 | partial                 |
|                              | <i>Sp-Tlr164</i> | SPU_003419       | SP-NT-LRR(23)-CT-TM-TIR(XXX) | partial                 |
|                              | <i>Sp-Tlr170</i> | SPU_030136       | SP-NT-LRR(23)-CT-TM-TIR(XXX) | partial                 |
|                              | <i>Sp-Tlr172</i> | SPU_009343       | (XXX)-TIR(XXX)               | partial                 |
|                              | <i>Sp-Tlr221</i> | SPU_015333       | (XXX)-CT-TM-TIR              | partial                 |
|                              | <i>Sp-Tlr223</i> | SPU_030075       | (XXX)-CT-TM-TIR              | partial                 |
|                              | <i>Sp-Tlr225</i> | SPU_030077       | (XXX)-LRR(5)-CT-TM-TIR       | partial                 |
|                              | <i>Sp-Tlr226</i> | SPU_030078       | (XXX)-LRR(10)-CT-TM-TIR      | partial                 |
|                              | <i>Sp-Tlr009</i> | SPU_000985       |                              | pseudo                  |
|                              | <i>Sp-Tlr176</i> | SPU_010320       |                              | pseudo                  |
|                              | <i>Sp-Tlr188</i> | SPU_014352       |                              | pseudo                  |
|                              | <i>Sp-Tlr199</i> | SPU_017794       |                              | pseudo                  |
| <i>Sp-Tlr202</i>             | SPU_019882       |                  | pseudo                       |                         |
| <b>Group IV</b>              | <i>Sp-Tlr039</i> | SPU_007790       | SP-NT-LRR(22)-CT-TM-TIR      | complete                |
|                              | <i>Sp-Tlr045</i> | SPU_008278       | SP-NT-LRR(22)-CT-TM-TIR      | complete                |
|                              | <i>Sp-Tlr046</i> | SPU_008396       | SP-NT-LRR(22)-CT-TM-TIR      | complete                |
|                              | <i>Sp-Tlr096</i> | SPU_018409       | SP-NT-LRR(22)-CT-TM-TIR      | complete                |
|                              | <i>Sp-Tlr097</i> | SPU_018410       | SP-NT-LRR(22)-CT-TM-TIR      | complete                |
|                              | <i>Sp-Tlr122</i> | SPU_024062       | SP-NT-LRR(22)-CT-TM-TIR      | complete                |
|                              | <i>Sp-Tlr149</i> | SPU_027698       | SP-NT-LRR(22)-CT-TM-TIR      | complete                |
|                              | <i>Sp-Tlr191</i> | SPU_015185       | SP-NT-LRR(22)-CT-TM-TIR      | complete                |
|                              | <i>Sp-Tlr186</i> | SPU_013162       | (XXX)-TIR                    | partial                 |
|                              | <i>Sp-Tlr209</i> | SPU_021075       | (XXX)-TM-TIR                 | partial                 |
|                              | <i>Sp-Tlr055</i> | SPU_009970       |                              | pseudo                  |
|                              | <i>Sp-Tlr081</i> | SPU_015132       |                              | pseudo                  |
|                              | <i>Sp-Tlr177</i> | SPU_010680       |                              | pseudo                  |
|                              | <i>Sp-Tlr196</i> | SPU_017104       |                              | pseudo                  |
|                              | <b>Group V</b>   | <i>Sp-Tlr056</i> | SPU_010575                   | SP-NT-LRR(22)-CT-TM-TIR |
| <i>Sp-Tlr084</i>             |                  | SPU_016457       | SP-NT-LRR(22)-CT-TM-TIR      | complete                |
| <i>Sp-Tlr101</i>             |                  | SPU_018928       | SP-NT-LRR(22)-CT-TM-TIR      | complete                |
| <i>Sp-Tlr183</i>             |                  | SPU_030095       | (XXX)-CT-TM-TIR              | partial                 |
| <i>Sp-Tlr185</i>             |                  | SPU_013111       | (XXX)-TIR                    | partial                 |
| <i>Sp-Tlr198</i>             |                  | SPU_017735       | (XXX)-LRR(3)-CT-TM-TIR       | partial                 |
| <i>Sp-Tlr104</i>             |                  | SPU_019834       |                              | pseudo                  |
| <i>Sp-Tlr143</i>             |                  | SPU_026274       |                              | pseudo                  |

\* Domain Structure: SP = Signal Peptide; LRR = Leucine-Rich Repeat; NT = N-terminal type LRR; CT = C-terminal type LRR; TM = Transmembrane domain; TIR = Toll/IL-1R domain; (XXX) Predicted missing sequence.

Table S2 (cont.) - Full list of TLR genes.

| Cluster                  | Gene name        | Gene ID    | Domain Structure *                | Status   |
|--------------------------|------------------|------------|-----------------------------------|----------|
| <b>Group V (cont.)</b>   | <i>Sp-Tlr144</i> | SPU_026275 |                                   | pseudo   |
| <b>Group VI</b>          | <i>Sp-Tlr044</i> | SPU_008267 | SP-NT-LRR(24)-CT-TM-TIR           | complete |
|                          | <i>Sp-Tlr071</i> | SPU_013470 | SP-NT-LRR(24)-CT-TM-TIR           | complete |
|                          | <i>Sp-Tlr092</i> | SPU_018211 | SP-NT-LRR(24)-CT-TM-TIR           | complete |
|                          | <i>Sp-Tlr093</i> | SPU_018212 | SP-NT-LRR(24)-CT-TM-TIR           | complete |
|                          | <i>Sp-Tlr116</i> | SPU_022909 | SP-NT-LRR(24)-CT-TM-TIR           | complete |
|                          | <i>Sp-Tlr117</i> | SPU_022911 | SP-NT-LRR(24)-CT-TM-TIR           | complete |
|                          | <i>Sp-Tlr131</i> | SPU_024731 | SP-NT-LRR(24)-CT-TM-TIR           | complete |
|                          | <i>Sp-Tlr094</i> | SPU_018213 | (XXX)-NT-LRR(24)-CT-TM-TIR        | partial  |
| <b>Group VII</b>         | <i>Sp-Tlr016</i> | SPU_003578 | SP-NT-LRR(22)-CT-TM-TIR           | complete |
|                          | <i>Sp-Tlr017</i> | SPU_003579 | SP-NT-LRR(22)-CT-TM-TIR           | complete |
|                          | <i>Sp-Tlr090</i> | SPU_018055 | SP-NT-LRR(22)-CT-TM-TIR           | complete |
|                          | <i>Sp-Tlr113</i> | SPU_021787 | (XXX)-LRR(20)-CT-TM-TIR           | partial  |
|                          | <i>Sp-Tlr180</i> | SPU_011328 |                                   | pseudo   |
| <b>Orphan</b>            | <i>Sp-Tlr072</i> | SPU_013676 | SP-NT-LRR(22)-CT-TM-TIR           | complete |
| <b>TLRs</b>              | <i>Sp-Tlr076</i> | SPU_014073 | SP-NT-LRR(22)-CT-TM-TIR           | complete |
|                          | <i>Sp-Tlr118</i> | SPU_023033 | SP-NT-LRR(22)-CT-TM-TIR           | complete |
|                          | <i>Sp-Tlr129</i> | SPU_024404 | SP-NT-LRR(22)-CT-TM-TIR           | complete |
|                          | <i>Sp-Tlr133</i> | SPU_024815 | SP-NT-LRR(22)-CT-TM-TIR           | complete |
|                          | <i>Sp-Tlr148</i> | SPU_027222 | SP-NT-LRR(22)-CT-TM-TIR           | complete |
|                          | <i>Sp-Tlr155</i> | SPU_028639 | SP-NT-LRR(22)-CT-TM-TIR           | complete |
| <b>Fly-like</b>          | <i>Sp-Tlr041</i> | SPU_007859 | SP-LRR(10)-CT-NT-LRR(4)-CT-TM-TIR | complete |
| <b>TLRs</b>              | <i>Sp-Tlr043</i> | SPU_008228 | SP-LRR(10)-CT-NT-LRR(4)-CT-TM-TIR | complete |
|                          | <i>Sp-Tlr066</i> | SPU_011823 | SP-LRR(12)-CT-NT-LRR(4)-CT-TM-TIR | complete |
| <b>Short TLRs</b>        | <i>Sp-Tlr011</i> | SPU_001970 | SP-NT-LRR(8)-CT-TM-TIR            | complete |
|                          | <i>Sp-Tlr012</i> | SPU_001971 | SP-NT-LRR(8)-CT-TM-TIR            | complete |
|                          | <i>Sp-Tlr106</i> | SPU_020996 | SP-NT-LRR(8)-CT-TM-TIR            | complete |
|                          | <i>Sp-Tlr107</i> | SPU_020997 | SP-NT-LRR(8)-CT-TM-TIR            | complete |
|                          | <i>Sp-Tlr159</i> | SPU_001458 | SP-NT-LRR(8)-CT-TM-TIR            | complete |
| <b>Intron containing</b> | <i>Sp-Tlr100</i> | SPU_018838 | SP-NT-LRR(21)-CT-TM-TIR           | complete |
| <b>TLRs</b>              | <i>Sp-Tlr027</i> | SPU_005830 | (XXX)-LRR(1)-CT-TM-TIR            | partial  |
|                          | <i>Sp-Tlr028</i> | SPU_005832 | (XXX)-LRR(4)-CT-TM-TIR            | partial  |

\* Domain Structure: SP = Signal Peptide; LRR = Leucine-Rich Repeat; NT = N-terminal type LRR; CT = C-terminal type LRR; TM = Transmembrane domain; TIR = Toll/IL-1R domain; (XXX) Predicted missing sequence.

Supplementary Table S3. Full categorized list of NACTH-LRR (NLR) genes found in the *Strongylocentrotus purpuratus* genome.

| Cluster   | Gene model ID | Assigned name     | Domain Structure * |
|-----------|---------------|-------------------|--------------------|
| Cluster 1 | SPU_000863    | <i>Sp-NLR-152</i> | D,N,(L)n           |
|           | SPU_001549    | <i>Sp-NLR-169</i> | N,(L)n             |
|           | SPU_001884    | <i>Sp-NLR-159</i> | N,(L)n             |
|           | SPU_002888    | <i>Sp-NLR-172</i> | N,(L)n             |
|           | SPU_003247    | <i>Sp-NLR-133</i> | D,N,(L)n           |
|           | SPU_003539    | <i>Sp-NLR-3</i>   | D,N,(L)n           |
|           | SPU_003553    | <i>Sp-NLR-2</i>   | N,C,(L)n           |
|           | SPU_003797    | <i>Sp-NLR-136</i> | D,N,(L)n           |
|           | SPU_005026    | <i>Sp-NLR-124</i> | D,D,N,(L)n         |
|           | SPU_005383    | <i>Sp-NLR-140</i> | D,N,(L)n           |
|           | SPU_006610    | <i>Sp-NLR-4</i>   | D,N,(L)n           |
|           | SPU_007446    | <i>Sp-NLR-150</i> | D,N,(L)n           |
|           | SPU_008498    | <i>Sp-NLR-134</i> | N,(L)n             |
|           | SPU_008707    | <i>Sp-NLR-149</i> | D,N,(L)n           |
|           | SPU_009659    | <i>Sp-NLR-127</i> | D,N,(L)n           |
|           | SPU_010091    | <i>Sp-NLR-176</i> | D,N,(L)n           |
|           | SPU_015033    | <i>Sp-NLR-195</i> | N,(L)n             |
|           | SPU_011097    | <i>Sp-NLR-196</i> | N,(L)n             |
|           | SPU_011776    | <i>Sp-NLR-44</i>  | D,N,(L)n,N,(L)n    |
|           | SPU_011855    | <i>Sp-NLR-130</i> | D,N,(L)n           |
|           | SPU_013038    | <i>Sp-NLR-193</i> | N,(L)n             |
|           | SPU_016060    | <i>Sp-NLR-192</i> | N,(L)n             |
|           | SPU_016257    | <i>Sp-NLR-142</i> | D,N,(L)n           |
|           | SPU_016810    | <i>Sp-NLR-138</i> | D,N,(L)n           |
|           | SPU_016926    | <i>Sp-NLR-143</i> | D,N,(L)n           |
|           | SPU_017196    | <i>Sp-NLR-132</i> | D,N,(L)n           |
|           | SPU_017505    | <i>Sp-NLR-131</i> | D,N,(L)n           |
|           | SPU_018384    | <i>Sp-NLR-120</i> | D,N,(L)n           |
|           | SPU_022001    | <i>Sp-NLR-137</i> | D,N,(L)n           |
|           | SPU_022564    | <i>Sp-NLR-191</i> | D,N,(L)n           |
|           | SPU_023183    | <i>Sp-NLR-141</i> | D,N,(L)n           |
|           | SPU_025166    | <i>Sp-NLR-126</i> | D,N,(L)n           |
|           | SPU_025167    | <i>Sp-NLR-156</i> | D,N,C,(L)n         |
|           | SPU_025179    | <i>Sp-NLR-123</i> | D,N,(L)n           |
|           | SPU_026036    | <i>Sp-NLR-151</i> | D,D,(L)n,N,(L)n    |
|           | SPU_026400    | <i>Sp-NLR-155</i> | N,(L)n             |
|           | SPU_026622    | <i>Sp-NLR-139</i> | N,(L)n             |
|           | SPU_027035    | <i>Sp-NLR-194</i> | N,(L)n             |

\* The domains are abbreviated as follows: D: DEATH, C: CARD, P: PYD, N: NACTH, L: LRR, E: EGF, T: TM, S: Signal peptide, F: FBG, SD: Sterol desaturase.

(E) indicates embryonic expression of the gene model as indicated by hybridization of pooled RNA samples from egg, early blastula, gastrula and prism stage embryos to a high-density tiling array of the *S. purpuratus* genome (Samanta et al., 2006)

Table S3 (cont.) - Full list of NLR genes.

| Cluster                     | Gene model ID    | Assigned name                               | Domain Structure * |
|-----------------------------|------------------|---------------------------------------------|--------------------|
| <b>Cluster 1</b><br>(cont.) | SPU_027207       | <i>Sp-NLR-190</i>                           | N,(L)n             |
|                             | SPU_027511       | <i>Sp-NLR-119</i>                           | D,N,(L)n           |
|                             | SPU_027610       | <i>Sp-NLR-135</i>                           | D,N,(L)n           |
|                             | SPU_027808       | <i>Sp-NLR-154</i>                           | D,N,(L)n           |
|                             | SPU_028820       | <i>Sp-NLR-138</i>                           | N,(L)n             |
| <b>Cluster 2</b>            | SPU_000672       | <i>Sp-NLR-41</i>                            | D,N,(L)n,7T        |
|                             | SPU_001054       | <i>Sp-NLR-48</i>                            | D,N,C,(L)n         |
|                             | SPU_001608       | <i>Sp-NLR-181</i>                           | N,(L)n             |
|                             | SPU_002423       | <i>Sp-NLR-56</i>                            | D,N,(L)n           |
|                             | SPU_002758       | <i>SpNacht Death box containing protein</i> | D,N,(L)n           |
|                             | SPU_003200       | <i>Sp-NLR-9</i>                             | D,N,(L)n           |
|                             | SPU_004053       | <i>Sp-NLR-13</i>                            | D,N,(L)n           |
|                             | SPU_006219       | <i>Sp-NLR-198</i>                           | D,N,(L)n,T         |
|                             | SPU_008547       | <i>Sp-NLR-50</i>                            | D,N,C,(L)n         |
|                             | SPU_009017       | <i>Sp-NLR-10</i>                            | D,N,(L)n           |
|                             | SPU_010053       | <i>Sp-NLR-102</i>                           | D,N,(L)n           |
|                             | SPU_013504       | <i>Sp-NLR-51</i>                            | D,N,C(L)n          |
|                             | SPU_015105       | <i>Sp-NLR-63</i>                            | D,N,(L)n           |
|                             | SPU_015768       | <i>Sp-NLR-179</i>                           | N,(L)n             |
|                             | SPU_015972       | <i>Sp-NLR-33</i>                            | D,N,(L)n           |
|                             | SPU_016794       | <i>Sp-NLR-114</i>                           | N,(L)n             |
|                             | SPU_016921       | <i>Sp-NLR-49</i>                            | D,N,(L)n           |
|                             | SPU_017129       | <i>Sp-NLR-25</i>                            | N,(L)n             |
|                             | SPU_017341       | <i>Sp-NLR-52</i>                            | D,N,C,(L)n         |
|                             | SPU_021447       | <i>Sp-NLR-54</i>                            | D,N,(L)n           |
|                             | SPU_025077       | <i>Sp-NLR-46</i>                            | D,N,C,(L)n         |
|                             | SPU_025680       | <i>Sp-NLR-7</i>                             | D,D,N,(L)n         |
|                             | SPU_026921       | <i>Sp-NLR-14</i>                            | D,N,(L)n           |
|                             | SPU_027513       | <i>Sp-NLR-47</i>                            | D,N,C,(L)n         |
|                             | SPU_028485       | <i>Sp-NLR-182</i>                           | N,(L)n             |
|                             | SPU_028681       | <i>Sp-NLR-8</i>                             | D,N,(L)n           |
|                             | <b>Cluster 3</b> | SPU_000457                                  | <i>Sp-NLR-91</i>   |
| SPU_006203                  |                  | <i>Sp-NLR-93</i>                            | D,N,(L)n           |
| SPU_008283                  |                  | <i>Sp-NLR-88</i>                            | D,N,(L)n           |
| SPU_009111                  |                  | <i>Sp-NLR-24</i>                            | D,N,(L)n           |
| SPU_023120                  |                  | <i>Sp-NLR-79</i>                            | N,(L)n             |
| SPU_025204                  |                  | <i>Sp-NLR-90</i>                            | D,N,(L)n           |
| <b>Cluster 4</b>            | SPU_001548       | <i>Sp-NLR-53</i>                            | D,N,(L)n           |

\* The domains are abbreviated as follows: D: DEATH, C: CARD, P: PYD, N: NACHT, L: LRR, E: EGF, T: TM, S: Signal peptide, F: FBG, SD: Sterol desaturase.

(E) indicates embryonic expression of the gene model as indicated by hybridization of pooled RNA samples from egg, early blastula, gastrula and prism stage embryos to a high-density tiling array of the *S. purpuratus* genome (Samanta et al., 2006)

Table S3 (cont.) - Full list of NLR genes.

| Cluster                     | Gene model ID    | Assigned name     | Domain Structure * |
|-----------------------------|------------------|-------------------|--------------------|
| <b>Cluster 4</b><br>(cont.) | SPU_001781       | <i>Sp-NLR-20</i>  | D,N,(L)n           |
|                             | SPU_002641       | <i>Sp-NLR-12</i>  | D,N,(L)n           |
|                             | SPU_005462       | <i>Sp-NLR-65</i>  | D,N,(L)n           |
|                             | SPU_006733       | <i>Sp-NLR-86</i>  | N,(L)n             |
|                             | SPU_008597       | <i>Sp-NLR-76</i>  | D,N,(L)n           |
|                             | SPU_017054       | <i>Sp-NLR-17</i>  | D,N,(L)n           |
|                             | SPU_019497       | <i>Sp-NLR-185</i> | N,(L)n             |
|                             | SPU_024649       | <i>Sp-NLR-62</i>  | D,N,(L)n           |
| <b>Cluster 5</b>            | SPU_002868       | <i>Sp-NLR-27</i>  | D,N,(L)n           |
|                             | SPU_003186       | <i>Sp-NLR-72</i>  | D,N,(L)n           |
|                             | SPU_005410       | <i>Sp-NLR-184</i> | N,(L)n             |
|                             | SPU_006019       | <i>Sp-NLR-183</i> | N,(L)n             |
|                             | SPU_008431       | <i>Sp-NLR-61</i>  | D,N,(L)n           |
|                             | SPU_013465       | <i>Sp-NLR-89</i>  | D,N,(L)n           |
|                             | SPU_015340       | <i>Sp-NLR-16</i>  | D,N,(L)n           |
|                             | SPU_017993 (E)   | <i>Sp-NLR-18</i>  | D,N,(L)n           |
|                             | SPU_020380       | <i>Sp-NLR-29</i>  | D,N,(L)n           |
|                             | SPU_021478       | <i>Sp-NLR-58</i>  | C,D,N,(L)n         |
|                             | SPU_022394       | <i>Sp-NLR-60</i>  | D,N,(L)n           |
|                             | SPU_022780       | <i>Sp-NLR-26</i>  | D,N,(L)n           |
|                             | SPU_023550       | <i>Sp-NLR-67</i>  | D,N,(L)n           |
|                             | SPU_025138       | <i>Sp-NLR-68</i>  | D,N,(L)n           |
|                             | SPU_026071       | <i>Sp-NLR-57</i>  | D,N,(L)n           |
|                             | SPU_028294       | <i>Sp-NLR-42</i>  | D,N,(L)n           |
| SPU_028387                  | <i>Sp-NLR-69</i> | D,N,(L)n          |                    |
| <b>Cluster 6</b>            | SPU_000015       | <i>Sp-NLR-94</i>  | S,D,N,(L)n         |
|                             | SPU_000852       | <i>Sp-NLR-71</i>  | S,D,N,(L)n         |
|                             | SPU_000896       | <i>Sp-NLR-28</i>  | S,D,N,(L)n         |
|                             | SPU_001423       | <i>Sp-NLR-200</i> | S,D,N,(L)n         |
|                             | SPU_001444       | <i>Sp-NLR-78</i>  | S,D,N,(L)n         |
|                             | SPU_001630       | <i>Sp-NLR-166</i> | N,(L)n             |
|                             | SPU_007620       | <i>Sp-NLR-187</i> | N,(L)n             |
|                             | SPU_008382       | <i>Sp-NLR-21</i>  | D,N,(L)n           |
|                             | SPU_014503       | <i>Sp-NLR-74</i>  | S,D,N,(L)n         |
|                             | SPU_015481 (E)   | <i>Sp-NLR-85</i>  | D,N,(L)n           |
|                             | SPU_017245       | <i>Sp-NLR-73</i>  | S,D,N,(L)n         |
|                             | SPU_019699       | <i>Sp-NLR-82</i>  | S,D,N,C,(L)n       |
|                             | SPU_019700       | <i>Sp-NLR-77</i>  | D,N,(L)n           |

\* The domains are abbreviated as follows: D: DEATH, C: CARD, P: PYD, N: NACHT, L: LRR, E: EGF, T: TM, S: Signal peptide, F: FBG, SD: Sterol desaturase.

(E) indicates embryonic expression of the gene model as indicated by hybridization of pooled RNA samples from egg, early blastula, gastrula and prism stage embryos to a high-density tiling array of the *S. purpuratus* genome (Samanta et al., 2006)

Table S3 (cont.) - Full list of NLR genes.

| Cluster                     | Gene model ID     | Assigned name         | Domain Structure * |
|-----------------------------|-------------------|-----------------------|--------------------|
| <b>Cluster 6</b><br>(cont.) | SPU_020240        | <i>Sp-NLR-110</i>     | S,D,D,N,(L)n       |
|                             | SPU_021370        | <i>Sp-NLR-186</i>     | S,N,C,(L)n         |
|                             | SPU_022130        | <i>Sp-NLR-70</i>      | S,D,N,(L)n         |
|                             | SPU_023628        | <i>Sp-NLR-23</i>      | D,N,(L)n           |
|                             | SPU_028805        | <i>Sp-NLR-75</i>      | S,D,N,(L)n         |
| <b>Cluster 7</b>            | SPU_000816        | <i>Sp-NLR-81</i>      | S,D,N,(L)n         |
|                             | SPU_001016        | <i>Sp-NLR-113</i>     | S,D,N,(L)n         |
|                             | SPU_002272        | <i>Sp-NLR-105</i>     | N,(L)n             |
|                             | SPU_002372 (E)    | <i>Sp-NLR-55</i>      | S,D,N,(L)n         |
|                             | SPU_003934        | <i>Sp-NLR-64</i>      | S,D,N,(L)n         |
|                             | SPU_004043        | <i>Sp-NLR-30</i>      | D,N,(L)n           |
|                             | SPU_004165        | <i>Sp-NLR-84</i>      | S,D,N,(L)n         |
|                             | SPU_004872        | <i>Sp-NLR-19</i>      | S,D,N,(L)n         |
|                             | SPU_005993        | <i>Sp-NLR-92</i>      | S,D,N,(L)n         |
|                             | SPU_006456        | <i>Sp-NLR-161</i>     | N,(L)n             |
|                             | SPU_008833        | <i>Sp-NLR-112</i>     | S,D,N,(L)n         |
|                             | SPU_009488        | <i>Sp-NLR-22</i>      | S,D,N,(L)n         |
|                             | SPU_014128        | <i>Sp-NLR-11</i>      | S,D,N,(L)n         |
|                             | SPU_019696        | <i>Sp-NLR-95</i>      | S,D,N,(L)n         |
|                             | SPU_024020        | <i>Sp-FBG protein</i> | S,D,N,(L)n,E,F     |
|                             | SPU_026020        | <i>Sp-NLR-59</i>      | D,N,(L)n           |
|                             | SPU_026304        | <i>Sp-NLR-180</i>     | D,N,D,(L)n         |
|                             | SPU_028060        | <i>Sp-NLR-122</i>     | S,D,N,(L)n         |
|                             | SPU_028433        | <i>Sp-NLR-129</i>     | S,D,N,(L)n         |
|                             | SPU_028483        | <i>Sp-NLR-80</i>      | S,D,N,(L)n         |
| SPU_028595                  | <i>Sp-NLR-115</i> | S,D,N,(L)n            |                    |
| SPU_028630                  | <i>Sp-NLR-107</i> | S,D,N,(L)n            |                    |
| <b>Cluster 8.1</b>          | SPU_005609        | <i>Sp-NLR-128</i>     | D,N,(L)n           |
|                             | SPU_011439        | <i>Sp-NLR-103</i>     | N,D,(L)n           |
|                             | SPU_011441        | <i>Sp-NLR-101</i>     | D,N,C,(L)n         |
|                             | SPU_017708        | <i>Sp-NLR-37</i>      | D,N,(L)n           |
|                             | SPU_025600        | <i>Sp-NLR-147</i>     | D,N,(L)n           |
| <b>Cluster 8.2</b>          | SPU_003715        | <i>Sp-NLR-38</i>      | D,N,(L)n           |
|                             | SPU_006229        | <i>Sp-NLR-104</i>     | S,D,N,(L)n         |
|                             | SPU_010667        | <i>Sp-NLR-189</i>     | N,(L)n             |
|                             | SPU_013952        | <i>Sp-NLR-83</i>      | D,N,C,(L)n         |
|                             | SPU_015052        | <i>Sp-NLR-109</i>     | D,N,(L)n           |
|                             | SPU_017038        | <i>Sp-NLR-35</i>      | D,N,(L)n           |
|                             | SPU_020916 (E)    | <i>Sp-NLR-1</i>       | D,N,(L)n           |

\* The domains are abbreviated as follows: D: DEATH, C: CARD, P: PYD, N: NACHT, L: LRR, E: EGF, T: TM, S: Signal peptide, F: FBG, SD: Sterol desaturase.

(E) indicates embryonic expression of the gene model as indicated by hybridization of pooled RNA samples from egg, early blastula, gastrula and prism stage embryos to a high-density tiling array of the *S. purpuratus* genome (Samanta et al., 2006)

Table S3 (cont.) - Full list of NLR genes.

| Cluster            | Gene model ID  | Assigned name     | Domain Structure * |
|--------------------|----------------|-------------------|--------------------|
| <b>Cluster 8.3</b> | SPU_002436     | <i>Sp-NLR-34</i>  | D,N,(L)n           |
|                    | SPU_003366     | <i>Sp-NLR-118</i> | D,N,(L)n           |
|                    | SPU_003640 (E) | <i>Sp-NLR-116</i> | D,N,(L)n           |
|                    | SPU_005301     | <i>Sp-NLR-108</i> | D,N,(L)n           |
|                    | SPU_005581 (E) | <i>Sp-NLR-87</i>  | D,N,(L)n,N,(L)n    |
|                    | SPU_010097     | <i>Sp-NLR-106</i> | D,N,(L)n           |
|                    | SPU_013206     | <i>Sp-NLR-45</i>  | D,N,P,(L)n         |
|                    | SPU_014112     | <i>Sp-NLR-32</i>  | D,N,(L)n           |
|                    | SPU_014761 (E) | <i>Sp-NLR-111</i> | D,D,N,(L)n         |
|                    | SPU_021243     | <i>Sp-NLR-40</i>  | D,N,(L)n           |
|                    | SPU_021844     | <i>Sp-NLR-100</i> | N,(L)n             |
|                    | SPU_022294     | <i>Sp-NLR-39</i>  | D,N,(L)n           |
|                    | SPU_024975     | <i>Sp-NLR-36</i>  | D,N,(L)n           |
|                    | SPU_026189     | <i>Sp-NLR-121</i> | D,N,(L)n           |
|                    | SPU_027858     | <i>Sp-NLR-31</i>  | D,N,(L)n           |
| <b>Cluster 9.1</b> | SPU_003619     | <i>Sp-NLR-201</i> | E,E,N,(L)n         |
|                    | SPU_005732     | <i>Sp-NLR-168</i> | D,N,(L)n           |
|                    | SPU_011088     | <i>Sp-NLR-157</i> | D,E,N,(L)n         |
|                    | SPU_015206     | <i>Sp-NLR-160</i> | D,E,N,(L)n         |
|                    | SPU_021930     | <i>Sp-NLR-197</i> | D,N,(L)n           |
|                    | SPU_022070     | <i>Sp-NLR-158</i> | N,(L)n             |
|                    | SPU_022441     | <i>Sp-NLR-163</i> | D,N,(L)n           |
|                    | SPU_027300     | <i>Sp-NLR-170</i> | D,E,N,(L)n         |
| <b>Cluster 9.2</b> | SPU_001210     | <i>Sp-NLR-144</i> | D,N,(L)n           |
|                    | SPU_004343     | <i>Sp-NLR-145</i> | D,N,(L)n           |
|                    | SPU_011035     | <i>Sp-NLR-162</i> | D,D,N,(L)n         |
|                    | SPU_012713     | <i>Sp-NLR-167</i> | D,N,(L)n           |
|                    | SPU_014122     | <i>Sp-NLR-146</i> | D,N,(L)n           |
|                    | SPU_023642     | <i>Sp-NLR-153</i> | D,N,(L)n           |
|                    | SPU_024709     | <i>Sp-NLR-173</i> | D,N,(L)n           |
| <b>Outliers</b>    | SPU_000523     | <i>Sp-NLR-148</i> | D,N,(L)n           |
|                    | SPU_002962     | <i>Sp-NLR-66</i>  | D,N,(L)n           |
|                    | SPU_003762     | <i>Sp-NLR-117</i> | D,N,(L)n           |
|                    | SPU_006016     | <i>Sp-NLR-203</i> | D,N,(L)n,SD        |
|                    | SPU_013619     | <i>Sp-NLR-5</i>   | D,N,(L)n           |
|                    | SPU_023532 (E) | <i>Sp-NLR-6</i>   | D,N,(L)n           |
|                    | SPU_025914 (E) | <i>Sp-NLR-15</i>  | D,N,(L)n           |
|                    | SPU_025948     | <i>Sp-NLR-97</i>  | D,D,N,(L)n         |

\* The domains are abbreviated as follows: D: DEATH, C: CARD, P: PYD, N: NACHT, L: LRR, E: EGF, T: TM, S: Signal peptide, F: FBG, SD: Sterol desaturase.

(E) indicates embryonic expression of the gene model as indicated by hybridization of pooled RNA samples from egg, early blastula, gastrula and prism stage embryos to a high-density tiling array of the *S. purpuratus* genome (Samanta et al., 2006)

Supplementary Table S4. Full list of SRCR-containing genes in the *Strongylocentrotus purpuratus* genome.

| Group       | Gene name          | Gene ID        | Domain Structure *      | Status ‡ |
|-------------|--------------------|----------------|-------------------------|----------|
| SRCR models | <i>Sp-SRCR-001</i> | SPU_000337     | SP-SRCR(4)              | pp       |
|             | <i>Sp-SRCR-002</i> | SPU_000492     | SRCR(4) + SRCR(partial) | pp       |
|             | <i>Sp-SRCR-003</i> | SPU_000580     | SRCR(2)                 | pp       |
|             | <i>Sp-SRCR-004</i> | SPU_000646     | SP-SRCR(5)              | pp       |
|             | <i>Sp-SRCR-005</i> | SPU_000654     | SP-SRCR(2)              | pp       |
|             | <i>Sp-SRCR-006</i> | SPU_000740     | SP-SRCR(4)-TM           |          |
|             | <i>Sp-SRCR-007</i> | SPU_000876     | SRCR(2)                 | pp       |
|             | <i>Sp-SRCR-008</i> | SPU_000984     | SRCR(5)                 | pp       |
|             | <i>Sp-SRCR-011</i> | SPU_001172     | SRCR(3)-TM              | pp       |
|             | <i>Sp-SRCR-012</i> | SPU_001177     | SRCR(2)                 | pp       |
|             | <i>Sp-SRCR-013</i> | SPU_001229     | SRCR(5)                 | pp       |
|             | <i>Sp-SRCR-014</i> | SPU_001266     | SRCR(5)-TM              | pp       |
|             | <i>Sp-SRCR-018</i> | SPU_001727     | SRCR(9)                 | pp       |
|             | <i>Sp-SRCR-019</i> | SPU_001763     | SP-SRCR(2)              | pp       |
|             | <i>Sp-SRCR-020</i> | SPU_001863 (E) | SRCR(2)                 | pp       |
|             | <i>Sp-SRCR-021</i> | SPU_002028     | SRCR(2)                 | pp       |
|             | <i>Sp-SRCR-022</i> | SPU_002041     | SP-SRCR(3)-TM           |          |
|             | <i>Sp-SRCR-023</i> | SPU_002350     | SRCR(13)                | pp       |
|             | <i>Sp-SRCR-024</i> | SPU_003127     | SRCR(4)-TM              | pp       |
|             | <i>Sp-SRCR-025</i> | SPU_003384     | SRCR(4)                 | pp       |
|             | <i>Sp-SRCR-026</i> | SPU_003526     | SRCR(6)                 | pp       |
|             | <i>Sp-SRCR-027</i> | SPU_003778     | SP-SRCR(6)              | pp       |
|             | <i>Sp-SRCR-028</i> | SPU_003930     | SRCR(10)                | pp       |
|             | <i>Sp-SRCR-033</i> | SPU_004011     | SRCR(3)                 | pp       |
|             | <i>Sp-SRCR-034</i> | SPU_004086     | SRCR(4)                 | pp       |
|             | <i>Sp-SRCR-037</i> | SPU_004160     | SRCR(8)                 | pp       |
|             | <i>Sp-SRCR-040</i> | SPU_005000     | SP-SRCR(5)              | pp       |
|             | <i>Sp-SRCR-041</i> | SPU_005154     | SRCR(7)                 | pp       |
|             | <i>Sp-SRCR-043</i> | SPU_005464     | SRCR(6)-TM              | pp       |
|             | <i>Sp-SRCR-044</i> | SPU_005556     | SRCR(9)                 | pp       |

\* Domain Structure: SP, signal peptide; SRCR, Scavenger Receptor Cystein-Rich repeat; TM, transmembrane domain; WSC, WSC domain [carbohydrate binding domain present in Wall integrity and Stress response Component (WSC) proteins, polycystin and fungal exoglucanase]; HYR, Hyalin Repeat domain; GPS, G-protein-coupled receptor proteolytic site domain; TIL, domain found in proteinase inhibitors and many extracellular proteins; Somat, Somatomedin B-like domains; F5\_F8\_type\_C, Factors V and VIII/discoidin (DS) domain; RNaseH, RNase H domain; PTPc, Protein tyrosine phosphatase, catalytic domain.

‡ Status: pp, probably partial gene model.

(E) indicates embryonic expression of the gene model as indicated by hybridization of pooled RNA samples from egg, early blastula, gastrula and prism stage embryos to a high-density tiling array of the *S. purpuratus* genome (Samanta et al., 2006)



Table S4 (cont.) - Full list of SRCR genes.

| Group                  | Gene name          | Gene ID        | Domain Structure * | Status ‡ |
|------------------------|--------------------|----------------|--------------------|----------|
| SRCR models<br>(cont.) | <i>Sp-SRCR-046</i> | SPU_006045     | SRCR(2)            | pp       |
|                        | <i>Sp-SRCR-047</i> | SPU_006055     | SP-SRCR(4)-TM      |          |
|                        | <i>Sp-SRCR-048</i> | SPU_006254     | SRCR(4)-TM         | pp       |
|                        | <i>Sp-SRCR-049</i> | SPU_006264     | SRCR(4)            | pp       |
|                        | <i>Sp-SRCR-050</i> | SPU_006531     | SRCR(4)            | pp       |
|                        | <i>Sp-SRCR-053</i> | SPU_006731     | SP-SRCR(6)-TM      |          |
|                        | <i>Sp-SRCR-054</i> | SPU_007110     | SRCR(7)            | pp       |
|                        | <i>Sp-SRCR-055</i> | SPU_007618 (E) | SP-SRCR(2)-TM      |          |
|                        | <i>Sp-SRCR-056</i> | SPU_007660     | SRCR(3)-TM         | pp       |
|                        | <i>Sp-SRCR-057</i> | SPU_007718     | SRCR(6)-TM         | pp       |
|                        | <i>Sp-SRCR-060</i> | SPU_007893     | SRCR(6)            | pp       |
|                        | <i>Sp-SRCR-067</i> | SPU_008432     | SRCR(4)            | pp       |
|                        | <i>Sp-SRCR-068</i> | SPU_008504     | SRCR(16)           | pp       |
|                        | <i>Sp-SRCR-069</i> | SPU_008514     | SRCR(2)-TM         | pp       |
|                        | <i>Sp-SRCR-070</i> | SPU_008598     | SRCR(2)            | pp       |
|                        | <i>Sp-SRCR-071</i> | SPU_008642     | SP-SRCR(8)         | pp       |
|                        | <i>Sp-SRCR-072</i> | SPU_008836 (E) | SP-SRCR(2)         | pp       |
|                        | <i>Sp-SRCR-073</i> | SPU_008885     | SRCR(3)            | pp       |
|                        | <i>Sp-SRCR-074</i> | SPU_009145 (E) | SRCR(2)            | pp       |
|                        | <i>Sp-SRCR-075</i> | SPU_009354 (E) | SRCR(4)            | pp       |
|                        | <i>Sp-SRCR-076</i> | SPU_009496     | SP-SRCR(6)         | pp       |
|                        | <i>Sp-SRCR-077</i> | SPU_009562     | SRCR(2)            | pp       |
|                        | <i>Sp-SRCR-080</i> | SPU_009753     | SRCR(3)            | pp       |
|                        | <i>Sp-SRCR-082</i> | SPU_010001     | SRCR(2)            | pp       |
|                        | <i>Sp-SRCR-083</i> | SPU_010062     | SRCR(6)            | pp       |
|                        | <i>Sp-SRCR-086</i> | SPU_010232     | SP-SRCR(4)         | pp       |
|                        | <i>Sp-SRCR-089</i> | SPU_010409 (E) | SRCR(5)            |          |
|                        | <i>Sp-SRCR-090</i> | SPU_010501     | SP-SRCR(4)         | pp       |
|                        | <i>Sp-SRCR-091</i> | SPU_010523     | SRCR(2)            | pp       |
|                        | <i>Sp-SRCR-092</i> | SPU_010832     | SRCR(3)-TM         | pp       |

\* Domain Structure: SP, signal peptide; SRCR, Scavenger Receptor Cystein-Rich repeat; TM, transmembrane domain; WSC, WSC domain [carbohydrate binding domain present in Wall integrity and Stress response Component (WSC) proteins, polycystin and fungal exoglucanase]; HYR, Hyalin Repeat domain; GPS, G-protein-coupled receptor proteolytic site domain; TIL, domain found in proteinase inhibitors and many extracellular proteins; Somat, Somatomedin B-like domains; F5\_F8\_type\_C, Factors V and VIII/discoidin (DS) domain; RNaseH, RNase H domain; PTPc, Protein tyrosine phosphatase, catalytic domain.

‡ Status: pp, probably partial gene model.

(E) indicates embryonic expression of the gene model as indicated by hybridization of pooled RNA samples from egg, early blastula, gastrula and prism stage embryos to a high-density tiling array of the *S. purpuratus* genome (Samanta et al., 2006)

Table S4 (cont.) - Full list of SRCR genes.

| Group                  | Gene name          | Gene ID        | Domain Structure * | Status ‡ |
|------------------------|--------------------|----------------|--------------------|----------|
| SRCR models<br>(cont.) | <i>Sp-SRCR-093</i> | SPU_010909     | SRCR(3)-TM         | pp       |
|                        | <i>Sp-SRCR-094</i> | SPU_010953     | SRCR(5)            | pp       |
|                        | <i>Sp-SRCR-095</i> | SPU_010991 (E) | SRCR(6)-TM         | pp       |
|                        | <i>Sp-SRCR-099</i> | SPU_011101     | SP-SRCR(2)         | pp       |
|                        | <i>Sp-SRCR-100</i> | SPU_011146     | SRCR(3)            | pp       |
|                        | <i>Sp-SRCR-101</i> | SPU_011222 (E) | SP-SRCR(13)-TM     |          |
|                        | <i>Sp-SRCR-102</i> | SPU_011752     | SRCR(2)            | pp       |
|                        | <i>Sp-SRCR-103</i> | SPU_011977     | SP-SRCR(4)         | pp       |
|                        | <i>Sp-SRCR-104</i> | SPU_012039     | SP-SRCR(7)         | pp       |
|                        | <i>Sp-SRCR-105</i> | SPU_012159 (E) | SRCR(3)-TM         | pp       |
|                        | <i>Sp-SRCR-107</i> | SPU_012410     | SP-SRCR(6)         | pp       |
|                        | <i>Sp-SRCR-108</i> | SPU_012888     | SRCR(3)-TM         | pp       |
|                        | <i>Sp-SRCR-109</i> | SPU_013650 (E) | SP-SRCR(3)         | pp       |
|                        | <i>Sp-SRCR-110</i> | SPU_013831     | SRCR(3)            | pp       |
|                        | <i>Sp-SRCR-111</i> | SPU_013958     | SRCR(2)-TM         | pp       |
|                        | <i>Sp-SRCR-112</i> | SPU_014079     | SRCR(4)-TM         | pp       |
|                        | <i>Sp-SRCR-113</i> | SPU_014080     | SP-SRCR(2)         | pp       |
|                        | <i>Sp-SRCR-114</i> | SPU_014095     | SP-SRCR(4)         | pp       |
|                        | <i>Sp-SRCR-115</i> | SPU_014602 (E) | SP-SRCR(6)         | pp       |
|                        | <i>Sp-SRCR-116</i> | SPU_014829     | SRCR(7)            | pp       |
|                        | <i>Sp-SRCR-117</i> | SPU_014844 (E) | SP-SRCR(3)         | pp       |
|                        | <i>Sp-SRCR-118</i> | SPU_014859     | SRCR(4)            | pp       |
|                        | <i>Sp-SRCR-119</i> | SPU_014860     | SRCR(2)            | pp       |
|                        | <i>Sp-SRCR-123</i> | SPU_015123     | SRCR(3)            | pp       |
|                        | <i>Sp-SRCR-124</i> | SPU_015325 (E) | SRCR(2)            | pp       |
|                        | <i>Sp-SRCR-125</i> | SPU_015387     | SP-SRCR(4)         | pp       |
|                        | <i>Sp-SRCR-127</i> | SPU_015548     | SRCR(4)-TM         | pp       |
|                        | <i>Sp-SRCR-132</i> | SPU_016195     | SRCR(3)            | pp       |
|                        | <i>Sp-SRCR-135</i> | SPU_016531     | SRCR(2)            | pp       |
|                        | <i>Sp-SRCR-136</i> | SPU_016880 (E) | SRCR(4)            | pp       |
|                        | <i>Sp-SRCR-137</i> | SPU_017127     | SRCR(5)            | pp       |

\* Domain Structure: SP, signal peptide; SRCR, Scavenger Receptor Cystein-Rich repeat; TM, transmembrane domain; WSC, WSC domain [carbohydrate binding domain present in Wall integrity and Stress response Component (WSC) proteins, polycystin and fungal exoglucanase]; HYR, Hyalin Repeat domain; GPS, G-protein-coupled receptor proteolytic site domain; TIL, domain found in proteinase inhibitors and many extracellular proteins; Somat, Somatomedin B-like domains; F5\_F8\_type\_C, Factors V and VIII/discoidin (DS) domain; RNaseH, RNase H domain; PTPc, Protein tyrosine phosphatase, catalytic domain.

‡ Status: pp, probably partial gene model.

(E) indicates embryonic expression of the gene model as indicated by hybridization of pooled RNA samples from egg, early blastula, gastrula and prism stage embryos to a high-density tiling array of the *S. purpuratus* genome (Samanta et al., 2006)

Table S4 (cont.) - Full list of SRCR genes.

| Group                          | Gene name          | Gene ID        | Domain Structure * | Status ‡ |
|--------------------------------|--------------------|----------------|--------------------|----------|
| <b>SRCR models<br/>(cont.)</b> | <i>Sp-SRCR-138</i> | SPU_017194     | SRCR(2)            | pp       |
|                                | <i>Sp-SRCR-139</i> | SPU_017453 (E) | SP-SRCR(2)-TM      |          |
|                                | <i>Sp-SRCR-140</i> | SPU_017933     | SRCR(4)            | pp       |
|                                | <i>Sp-SRCR-141</i> | SPU_018252     | SRCR(8)-TM         | pp       |
|                                | <i>Sp-SRCR-144</i> | SPU_018508 (E) | SP-SRCR(2)-TM      |          |
|                                | <i>Sp-SRCR-145</i> | SPU_018737     | SP-SRCR(3)-TM      |          |
|                                | <i>Sp-SRCR-146</i> | SPU_018939     | SRCR(5)-TM         | pp       |
|                                | <i>Sp-SRCR-147</i> | SPU_018985     | SRCR(3)            | pp       |
|                                | <i>Sp-SRCR-148</i> | SPU_019241     | SP-SRCR(4)         | pp       |
|                                | <i>Sp-SRCR-151</i> | SPU_019291     | SRCR(2)            | pp       |
|                                | <i>Sp-SRCR-154</i> | SPU_019479     | SRCR(7)            | pp       |
|                                | <i>Sp-SRCR-155</i> | SPU_019826     | SRCR(5)-TM         | pp       |
|                                | <i>Sp-SRCR-156</i> | SPU_020081     | SRCR(5)            | pp       |
|                                | <i>Sp-SRCR-157</i> | SPU_020161     | SRCR(3)            | pp       |
|                                | <i>Sp-SRCR-161</i> | SPU_020822     | SP-SRCR(4)-TM      |          |
|                                | <i>Sp-SRCR-162</i> | SPU_020868     | SP-SRCR(2)         | pp       |
|                                | <i>Sp-SRCR-163</i> | SPU_021124     | SP-SRCR(6)-TM      |          |
|                                | <i>Sp-SRCR-164</i> | SPU_021348     | SP-SRCR(3)         | pp       |
|                                | <i>Sp-SRCR-165</i> | SPU_021457     | SRCR(2)            | pp       |
|                                | <i>Sp-SRCR-166</i> | SPU_021509     | SP-SRCR(6)         | pp       |
|                                | <i>Sp-SRCR-169</i> | SPU_021782     | SRCR(3)            | pp       |
| <i>Sp-SRCR-170</i>             | SPU_021789         | SRCR(7)-TM     | pp                 |          |
| <i>Sp-SRCR-171</i>             | SPU_021890         | SRCR(3)        | pp                 |          |
| <i>Sp-SRCR-172</i>             | SPU_021987         | SRCR(5)-TM     | pp                 |          |
| <i>Sp-SRCR-173</i>             | SPU_021988         | SP-SRCR(5)     | pp                 |          |
| <i>Sp-SRCR-175</i>             | SPU_022085         | SRCR(5)-TM     | pp                 |          |
| <i>Sp-SRCR-190</i>             | SPU_022339         | SP-SRCR(3)-TM  |                    |          |
| <i>Sp-SRCR-197</i>             | SPU_022814         | SRCR(4)        | pp                 |          |
| <i>Sp-SRCR-198</i>             | SPU_023641 (E)     | SP-SRCR(4)-TM  |                    |          |
| <i>Sp-SRCR-199</i>             | SPU_023677         | SRCR(5)-TM     | pp                 |          |
| <i>Sp-SRCR-200</i>             | SPU_023840         | SRCR(2)        | pp                 |          |
| <i>Sp-SRCR-201</i>             | SPU_023991         | SRCR(2)        | pp                 |          |

\* Domain Structure: SP, signal peptide; SRCR, Scavenger Receptor Cystein-Rich repeat; TM, transmembrane domain; WSC, WSC domain [carbohydrate binding domain present in Wall integrity and Stress response Component (WSC) proteins, polycystin and fungal exoglucanase]; HYR, Hyalin Repeat domain; GPS, G-protein-coupled receptor proteolytic site domain; TIL, domain found in proteinase inhibitors and many extracellular proteins; Somat, Somatomedin B-like domains; F5\_F8\_type\_C, Factors V and VIII/discoidin (DS) domain; RNaseH, RNase H domain; PTPc, Protein tyrosine phosphatase, catalytic domain.

‡ Status: pp, probably partial gene model.

(E) indicates embryonic expression of the gene model as indicated by hybridization of pooled RNA samples from egg, early blastula, gastrula and prism stage embryos to a high-density tiling array of the *S. purpuratus* genome (Samanta et al., 2006)

Table S4 (cont.) - Full list of SRCR genes.

| Group                          | Gene name                                      | Gene ID            | Domain Structure * | Status ‡      |
|--------------------------------|------------------------------------------------|--------------------|--------------------|---------------|
| <b>SRCR models<br/>(cont.)</b> | <i>Sp-SRCR-202</i>                             | SPU_024084         | SRCR(4)            | pp            |
|                                | <i>Sp-SRCR-204</i>                             | SPU_024408         | SP-SRCR(7)-TM      |               |
|                                | <i>Sp-SRCR-205</i>                             | SPU_024440         | SP-SRCR(4)-TM      |               |
|                                | <i>Sp-SRCR-206</i>                             | SPU_024487 (E)     | SRCR(9)            | pp            |
|                                | <i>Sp-SRCR-207</i>                             | SPU_025862         | SRCR(3)            | pp            |
|                                | <i>Sp-SRCR-208</i>                             | SPU_025865         | SRCR(3)            | pp            |
|                                | <i>Sp-SRCR-209</i>                             | SPU_025968         | SP-SRCR(3)         | pp            |
|                                | <i>Sp-SRCR-210</i>                             | SPU_025983         | SRCR(27)           | pp            |
|                                | <i>Sp-SRCR-211</i>                             | SPU_026234         | SRCR(3)            | pp            |
|                                | <i>Sp-SRCR-212</i>                             | SPU_026241 (E)     | SRCR(2)            | pp            |
|                                | <i>Sp-SRCR-213</i>                             | SPU_026408         | SP-SRCR(3)         | pp            |
|                                | <i>Sp-SRCR-214</i>                             | SPU_026709 (E)     | SP-SRCR(4)         | pp            |
|                                | <i>Sp-SRCR-217</i>                             | SPU_027037         | SP-SRCR(2)         | pp            |
|                                | <i>Sp-SRCR-220</i>                             | SPU_027379         | SRCR(9)            | pp            |
|                                | <i>Sp-SRCR-221</i>                             | SPU_027503 (E)     | SP-SRCR(3)         | pp            |
|                                | <i>Sp-SRCR-222</i>                             | SPU_027619         | SRCR(5)            | pp            |
|                                | <i>Sp-SRCR-223</i>                             | SPU_028233         | SP-SRCR(3)         | pp            |
|                                | <i>Sp-SRCR-224</i>                             | SPU_028382         | SRCR(3)            | pp            |
|                                | <i>Sp-SRCR-225</i>                             | SPU_028612         | SRCR(6)            | pp            |
|                                | <i>Sp-SRCR-226</i>                             | SPU_028669         | SP-SRCR(3)         | pp            |
|                                | <i>Sp-SRCR-228</i>                             | SPU_028804         | SRCR(3)            | pp            |
|                                | <b>Contiguous<br/>(fragmented?)<br/>models</b> | <i>Sp-SRCR-009</i> | SPU_001004         | TM/SP-SRCR(8) |
| <i>Sp-SRCR-010</i>             |                                                | SPU_001005         | SRCR(4)            |               |
| <i>Sp-SRCR-029</i>             |                                                | SPU_003963         | SRCR(6)-TM         | pp            |
| <i>Sp-SRCR-030</i>             |                                                | SPU_003964         | SRCR(3)-TM         | pp            |
| <i>Sp-SRCR-031</i>             |                                                | SPU_003965         | SRCR(2)            | pp            |
| <i>Sp-SRCR-032</i>             |                                                | SPU_003966         | SRCR(3)-TM         | pp            |
| <i>Sp-SRCR-035</i>             |                                                | SPU_004100 (E)     | SP-SRCR(2)-TM      | pp            |
| <i>Sp-SRCR-036</i>             |                                                | SPU_004101         | SP-SRCR(7)-TM      | pp            |
| <i>Sp-SRCR-051</i>             |                                                | SPU_006538         | SRCR(2)            | pp            |

\* Domain Structure: SP, signal peptide; SRCR, Scavenger Receptor Cystein-Rich repeat; TM, transmembrane domain; WSC, WSC domain [carbohydrate binding domain present in Wall integrity and Stress response Component (WSC) proteins, polycystin and fungal exoglucanase]; HYR, Hyalin Repeat domain; GPS, G-protein-coupled receptor proteolytic site domain; TIL, domain found in proteinase inhibitors and many extracellular proteins; Somat, Somatomedin B-like domains; F5\_F8\_type\_C, Factors V and VIII/discoidin (DS) domain; RNaseH, RNase H domain; PTPc, Protein tyrosine phosphatase, catalytic domain.

‡ Status: pp, probably partial gene model.

(E) indicates embryonic expression of the gene model as indicated by hybridization of pooled RNA samples from egg, early blastula, gastrula and prism stage embryos to a high-density tiling array of the *S. purpuratus* genome (Samanta et al., 2006)

Table S4 (cont.) - Full list of SRCR genes.

| Group                                         | Gene name          | Gene ID        | Domain Structure *                        | Status ‡ |
|-----------------------------------------------|--------------------|----------------|-------------------------------------------|----------|
| Contiguous<br>(fragmented?)<br>models (cont.) | <i>Sp-SRCR-052</i> | SPU_006539     | SP-SRCR(12)                               | pp       |
|                                               | <i>Sp-SRCR-058</i> | SPU_007781     | SRCR(10)-TM                               | pp       |
|                                               | <i>Sp-SRCR-059</i> | SPU_007782     | SRCR(5)                                   | pp       |
|                                               | <i>Sp-SRCR-061</i> | SPU_007894     | SRCR(4)                                   | pp       |
|                                               | <i>Sp-SRCR-062</i> | SPU_007895     | SRCR(2)                                   | pp       |
|                                               | <i>Sp-SRCR-063</i> | SPU_007896     | SRCR(7)-TM                                | pp       |
|                                               | <i>Sp-SRCR-064</i> | SPU_007897     | SRCR(2)-TM                                | pp       |
|                                               | <i>Sp-SRCR-065</i> | SPU_007899     | SP-SRCR(5)-TM                             | pp       |
|                                               | <i>Sp-SRCR-066</i> | SPU_007900     | SRCR(4)-TM                                | pp       |
|                                               | <i>Sp-SRCR-078</i> | SPU_009676     | SRCR(3)                                   | pp       |
|                                               | <i>Sp-SRCR-079</i> | SPU_009677     | SRCR(3)                                   | pp       |
|                                               | <i>Sp-SRCR-084</i> | SPU_010226     | SRCR(4)                                   | pp       |
|                                               | <i>Sp-SRCR-085</i> | SPU_010227     | F5_F8_type_C-SRCR(9)                      | pp       |
|                                               | <i>Sp-SRCR-087</i> | SPU_010240     | SRCR(2)                                   | pp       |
|                                               | <i>Sp-SRCR-088</i> | SPU_010241     | SRCR(2)                                   | pp       |
|                                               | <i>Sp-SRCR-096</i> | SPU_010992 (E) | SP-SRCR(2)-TM                             | pp       |
|                                               | <i>Sp-SRCR-097</i> | SPU_010993 (E) | SP-SRCR(5)                                | pp       |
|                                               | <i>Sp-SRCR-098</i> | SPU_010994 (E) | SRCR(2)-TM                                | pp       |
|                                               | <i>Sp-SRCR-120</i> | SPU_014992     | SRCR(8)-TM                                | pp       |
|                                               | <i>Sp-SRCR-121</i> | SPU_014993     | RNaseH-SRCR(4)-TM - possibly a wrong call | pp       |
| <i>Sp-SRCR-122</i>                            | SPU_014994         | SRCR(9)        | pp                                        |          |
| <i>Sp-SRCR-128</i>                            | SPU_015937 (E)     | SRCR(2)-TM     | pp                                        |          |
| <i>Sp-SRCR-129</i>                            | SPU_015938         | SP-SRCR(3)     | pp                                        |          |
| <i>Sp-SRCR-130</i>                            | SPU_015989         | SRCR(2)        | pp                                        |          |
| <i>Sp-SRCR-131</i>                            | SPU_015991         | SP-SRCR(2)-TM  |                                           |          |
| <i>Sp-SRCR-133</i>                            | SPU_016373 (E)     | SRCR(2)-TM     | pp                                        |          |
| <i>Sp-SRCR-134</i>                            | SPU_016374 (E)     | SRCR(9)        | pp                                        |          |
| <i>Sp-SRCR-142</i>                            | SPU_018429 (E)     | SRCR(13)       | pp                                        |          |
| <i>Sp-SRCR-143</i>                            | SPU_018430         | SP-SRCR(5)     | pp                                        |          |
| <i>Sp-SRCR-149</i>                            | SPU_019262         | SRCR(2)        | pp                                        |          |

\* Domain Structure: SP, signal peptide; SRCR, Scavenger Receptor Cystein-Rich repeat; TM, transmembrane domain; WSC, WSC domain [carbohydrate binding domain present in Wall integrity and Stress response Component (WSC) proteins, polycystin and fungal exoglucanase]; HYR, Hyalin Repeat domain; GPS, G-protein-coupled receptor proteolytic site domain; TIL, domain found in proteinase inhibitors and many extracellular proteins; Somat, Somatomedin B-like domains; F5\_F8\_type\_C, Factors V and VIII/discoidin (DS) domain; RNaseH, RNase H domain; PTPc, Protein tyrosine phosphatase, catalytic domain.

‡ Status: pp, probably partial gene model.

(E) indicates embryonic expression of the gene model as indicated by hybridization of pooled RNA samples from egg, early blastula, gastrula and prism stage embryos to a high-density tiling array of the *S. purpuratus* genome (Samanta et al., 2006)

Table S4 (cont.) - Full list of SRCR genes.

| Group                                                  | Gene name          | Gene ID        | Domain Structure *          | Status ‡ |
|--------------------------------------------------------|--------------------|----------------|-----------------------------|----------|
| <b>Contiguous<br/>(fragmented?)<br/>models (cont.)</b> | <i>Sp-SRCR-150</i> | SPU_019263     | SRCR(3)                     | pp       |
|                                                        | <i>Sp-SRCR-167</i> | SPU_021691     | SP-SRCR(2)                  | pp       |
|                                                        | <i>Sp-SRCR-168</i> | SPU_021692     | SRCR(4)-TM                  | pp       |
|                                                        | <i>Sp-SRCR-176</i> | SPU_022145     | SP-SRCR(6)                  | pp       |
|                                                        | <i>Sp-SRCR-177</i> | SPU_022146     | SRCR(5)                     | pp       |
|                                                        | <i>Sp-SRCR-178</i> | SPU_022147     | SRCR(3)                     | pp       |
|                                                        | <i>Sp-SRCR-179</i> | SPU_022148     | SRCR(4)                     | pp       |
|                                                        | <i>Sp-SRCR-180</i> | SPU_022149     | SRCR(8)                     | pp       |
|                                                        | <i>Sp-SRCR-181</i> | SPU_022150     | SRCR(5)                     | pp       |
|                                                        | <i>Sp-SRCR-182</i> | SPU_022151 (E) | SRCR(2)                     | pp       |
|                                                        | <i>Sp-SRCR-185</i> | SPU_022285     | SRCR(3)                     | pp       |
|                                                        | <i>Sp-SRCR-186</i> | SPU_022286     | SRCR(10)-TM                 | pp       |
|                                                        | <i>Sp-SRCR-187</i> | SPU_022287     | SRCR(4)-TM                  | pp       |
|                                                        | <i>Sp-SRCR-188</i> | SPU_022288     | SRCR(3)                     | pp       |
|                                                        | <i>Sp-SRCR-189</i> | SPU_022289     | SRCR(4)-TM                  | pp       |
|                                                        | <i>Sp-SRCR-191</i> | SPU_022423     | SRCR(4)                     | pp       |
|                                                        | <i>Sp-SRCR-192</i> | SPU_022424     | SRCR(8)-Sushi(2)            | pp       |
|                                                        | <i>Sp-SRCR-194</i> | SPU_022567     | SRCR(5)-TM                  | pp       |
|                                                        | <i>Sp-SRCR-195</i> | SPU_022568     | SRCR(5)                     | pp       |
|                                                        | <i>Sp-SRCR-196</i> | SPU_022569     | SRCR(3)                     | pp       |
| <i>Sp-SRCR-215</i>                                     | SPU_026848         | SRCR(8)        | pp                          |          |
| <i>Sp-SRCR-216</i>                                     | SPU_026849         | SRCR(14)-TM    | pp                          |          |
| <i>Sp-SRCR-218</i>                                     | SPU_027287         | SRCR(4)        | pp                          |          |
| <i>Sp-SRCR-219</i>                                     | SPU_027288         | SP-SRCR(17)    | pp                          |          |
| <b>SRCR and<br/>additional<br/>domains</b>             | <i>Sp-SRCR-016</i> | SPU_001601     | F5_F8_type_C(1)-SRCR(3)     | pp       |
|                                                        | <i>Sp-SRCR-038</i> | SPU_004642     | SRCR(2)-Sushi(1)?           | pp       |
|                                                        | <i>Sp-SRCR-042</i> | SPU_005420 (E) | SRCR(5)-Sushi(1)-TM         | pp       |
|                                                        | <i>Sp-SRCR-039</i> | SPU_007349 (E) | WSC(2)-SRCR-WSC-SRCR-WSC-TM | pp       |
|                                                        | <i>Sp-SRCR-017</i> | SPU_007370     | SP-SRCR(2)-HYR              | pp       |

\* Domain Structure: SP, signal peptide; SRCR, Scavenger Receptor Cystein-Rich repeat; TM, transmembrane domain; WSC, WSC domain [carbohydrate binding domain present in Wall integrity and Stress response Component (WSC) proteins, polycystin and fungal exoglucanase]; HYR, Hyalin Repeat domain; GPS, G-protein-coupled receptor proteolytic site domain; TIL, domain found in proteinase inhibitors and many extracellular proteins; Somat, Somatomedin B-like domains; F5\_F8\_type\_C, Factors V and VIII/discoidin (DS) domain; RNaseH, RNase H domain; PTPc, Protein tyrosine phosphatase, catalytic domain.

‡ Status: pp, probably partial gene model.

(E) indicates embryonic expression of the gene model as indicated by hybridization of pooled RNA samples from egg, early blastula, gastrula and prism stage embryos to a high-density tiling array of the *S. purpuratus* genome (Samanta et al., 2006)

Table S4 (cont.) - Full list of SRCR genes.

| Group                                      | Gene name             | Gene ID        | Domain Structure *                         | Status ‡ |
|--------------------------------------------|-----------------------|----------------|--------------------------------------------|----------|
| <b>SRCR and additional domains (cont.)</b> | <i>Sp-SRCR-015</i>    | SPU_007372     | SRCR(2)-HYR(2)-IgC2-GPS-SRCR(2)            | pp       |
|                                            | <i>Sp-SRCR-045</i>    | SPU_007840     | CUB(4)-SRCR(2)                             | pp       |
|                                            | <i>Sp-SRCR-184</i>    | SPU_009220     | SP-SRCR-WSC-CUB                            | pp       |
|                                            | <i>Sp-SRCR-183</i>    | SPU_010330     | SP-SRCR(2)-HYR                             |          |
|                                            | <i>Sp-SRCR-106</i>    | SPU_012230     | SP-SRCR(4)-EGF                             |          |
|                                            | <i>Sp-SRCR-126</i>    | SPU_015539     | SP-SRCR(2)-WSC                             |          |
|                                            | <i>Sp-SRCR-152</i>    | SPU_019370 (E) | SRCR(5)-Sushi-TM                           | pp       |
|                                            | <i>Sp-SRCR-153</i>    | SPU_019374     | SRCR(2)-HYR-SRCR(2)                        | pp       |
|                                            | <i>Sp-SRCR-158</i>    | SPU_020273     | EGF_CA(2)-SRCR(2)                          | pp       |
|                                            | <i>Sp-SRCR-159</i>    | SPU_020597 (E) | SRCR(8)-Sushi(3)-HYR-Sushi-HYR(2)-Sushi(2) | pp       |
|                                            | <i>Sp-SRCR-160</i>    | SPU_020650     | TIL-SRCR(4)                                | pp       |
|                                            | <i>Sp-SRCR-174</i>    | SPU_022000     | Somat-SRCR-Somat-SRCR-CUB.                 |          |
|                                            | <i>Sp-SRCR-193</i>    | SPU_022528     | SRCR(9)-EGF-SRCR(5)                        | pp       |
|                                            | <i>Sp-SRCR-203</i>    | SPU_024390     | SP-SRCR(2)-WSC-TM                          |          |
|                                            | <i>Sp-SRCR-227</i>    | SPU_028680     | EGF_CA(6)-EGF-SRCR(2)-EGF(2).              |          |
|                                            | <i>Sp-SRCR/PTPc-1</i> | SPU_005860     | SRCR(3)-TM-PTPc                            | pp       |
|                                            | <i>Sp-SRCR/LRR-1</i>  | SPU_006659     | SRCR(6)-LRR(3)                             | pp       |
|                                            | <i>Sp-Ig/SRCR-1</i>   | SPU_009988     | Ig(2)-SRCR(6)                              | pp       |
|                                            | <i>Sp-SRCR-081</i>    | SPU_009989     | SRCR(6)                                    | pp       |

\* Domain Structure: SP, signal peptide; SRCR, Scavenger Receptor Cystein-Rich repeat; TM, transmembrane domain; WSC, WSC domain [carbohydrate binding domain present in Wall integrity and Stress response Component (WSC) proteins, polycystin and fungal exoglucanase]; HYR, Hyalin Repeat domain; GPS, G-protein-coupled receptor proteolytic site domain; TIL, domain found in proteinase inhibitors and many extracellular proteins; Somat, Somatomedin B-like domains; F5\_F8\_type\_C, Factors V and VIII/discoidin (DS) domain; RNaseH, RNase H domain; PTPc, Protein tyrosine phosphatase, catalytic domain.

‡ Status: pp, probably partial gene model.

(E) indicates embryonic expression of the gene model as indicated by hybridization of pooled RNA samples from egg, early blastula, gastrula and prism stage embryos to a high-density tiling array of the *S. purpuratus* genome (Samanta et al., 2006)

Supplementary Table S5 - Full list of transcription factors with relevance to immune cell development and function in the *Strongylocentrotus purpuratus* genome sequence.

| <b>TF Family</b>                                         | <b>Gene model ID</b>                 | <b>Assigned name</b> |
|----------------------------------------------------------|--------------------------------------|----------------------|
| <b>ETS</b>                                               |                                      |                      |
| Ets-1,2                                                  | SPU_002874 (E)                       | <i>Sp-Ets1/2</i>     |
| Erg, Fli-1                                               | SPU_018483 (E)                       | <i>Sp-Erg</i>        |
| PU.1, Spi-B, Spi-C                                       | SPU_030060                           | <i>Sp-PU1</i>        |
| Elf-1                                                    | SPU_020124                           | <i>Sp-Elf-A</i>      |
|                                                          | SPU_020123                           | <i>Sp-Elf-B</i>      |
| Tel                                                      | SPU_008351/028479 <sup>(1)</sup> (E) | <i>Sp-Tel</i>        |
| GABP                                                     | SPU_021557                           | <i>Sp-Gabp</i>       |
| <b>GATA</b>                                              |                                      |                      |
| GATA-1/2/3                                               | SPU_027015 (E)                       | <i>SpGATAc</i>       |
| <b>Basic Helix-Loop-Helix (HLH) - Class I bHLH</b>       |                                      |                      |
| E2A, HEB, ITF-2                                          | SPU_016343 (E)                       | <i>Sp-E12</i>        |
| <b>Basic Helix-Loop-Helix (HLH) - Class II bHLH</b>      |                                      |                      |
| SCL                                                      | SPU_028093 (E)                       | <i>Sp-SCL</i>        |
| <b>Basic Helix-Loop-Helix (HLH) - Class III bHLH</b>     |                                      |                      |
| MITF/TFE3                                                | SPU_008175 (E)                       | <i>Sp-Mitf</i>       |
| <b>Basic Helix-Loop-Helix (HLH) - Class IV HLH/Id</b>    |                                      |                      |
| Id-2                                                     | SPU_015374 (E)                       | <i>Sp-Id</i>         |
| <b>Basic Helix-Loop-Helix (HLH) - Class VI Hairy/Hes</b> |                                      |                      |
| Hes-1,Hes-4                                              | SPU_006814 (E)                       | <i>SpHairy</i>       |
|                                                          | SPU_006813 (E)                       | <i>SpHairy</i>       |
|                                                          | SPU_015712 (E)                       | <i>SpHesL</i>        |
|                                                          | SPU_021608 (E)                       | <i>Sp-Hes</i>        |
| Hey/HERP                                                 | SPU_009465                           | <i>Sp-Hey</i>        |
| <b>RUNX</b>                                              |                                      |                      |
| Runx-1-3                                                 | SPU_025612/006917 <sup>(1)</sup> (E) | <i>Sp-Runt1</i>      |
|                                                          | SPU_007852 (E)                       | <i>Sp-Runt2</i>      |

(1) Two or more model IDs have been assigned to the same gene due to any of the following reasons: a) They represent duplicated models of the same gene; b) They correspond to both alleles of the same locus; c) They contain partial fragments of a gene broken up into more than one model..

(E) indicates embryonic expression of the gene model as indicated by hybridization of pooled RNA samples from egg, early blastula, gastrula and prism stage embryos to a high-density tiling array of the *S. purpuratus* genome (Samanta et al., 2006)



Table S5 (cont.) - Full list of immunity-related transcription factors

| <b>TF Family</b>                  | <b>Gene model ID</b>                 | <b>Assigned name</b>    |
|-----------------------------------|--------------------------------------|-------------------------|
| <b>OLF/EBF</b>                    |                                      |                         |
| EBF-1,2,3                         | SPU_004702                           | <i>Sp-EBF3</i>          |
| <b>PAX</b>                        |                                      |                         |
| Pax-5                             | SPU_014539                           | <i>SpPax2-5-8</i>       |
| <b>C/EBP</b>                      |                                      |                         |
| C/EBPalpha, beta, epsilon         | SPU_001657                           | <i>Sp-C/EBPb/d</i>      |
| C/EBPgamma                        | SPU_011002 (E)                       | <i>Sp-C/EBPg</i>        |
| <b>C2H2 Zinc Finger</b>           |                                      |                         |
| Ikaros                            | SPU_011260                           | <i>SpZ181</i>           |
| Egr-1,2,3                         | SPU_015358 (E)                       | <i>Sp-z60, SpEgr-1</i>  |
| LKLF, EKLF                        | SPU_020311 (E)                       | <i>Sp-LKLF</i>          |
| Gfi-1                             | SPU_012645 (E)                       | <i>Sp-Gfi, Sp-z166</i>  |
| Blimp-1                           | SPU_027235 (E)                       | <i>Sp-Blimp, Krox1a</i> |
| <b>TCF/LEF Hmg Box</b>            |                                      |                         |
| TCF-1, LEF-1                      | SPU_003704/027853 <sup>(1)</sup> (E) | <i>Sp-Lef</i>           |
| <b>Interferon Response Factor</b> |                                      |                         |
| IRF-1,2                           | SPU_010404                           | <i>Sp-IRF</i>           |
| IRF-4/Pip, IRF-8/ICSBP            | SPU_026877                           | <i>Sp-IRF4</i>          |
| <b>bZIP</b>                       |                                      |                         |
| c-fos, Fos, Fra-1, Fra-2          | SPU_021172 (E)                       | <i>Sp-Fos</i>           |
| c-jun, JunB, JunD                 | SPU_003102 (E)                       | <i>Sp-Jun</i>           |
| ATF-2, ATF-7, CREB                | SPU_026905 (E)                       | <i>Sp-ATF2</i>          |
| XBP-1                             | SPU_008703 (E)                       | <i>SpXBP-1</i>          |
| NFE                               | SPU_011174 (E)                       | <i>Sp-Nfe2</i>          |
| <b>REL Homology Domain</b>        |                                      |                         |
| c-rel, RelA, RelB                 | SPU_012203 (E)                       | <i>Sp-rel</i>           |
| NFkB1, NFkB p105                  | SPU_008177 (E)                       | <i>Sp-NFkB</i>          |
| NFATc, NFAT-4                     | SPU_015908 (E)                       | <i>NFAT</i>             |
| <b>STATs</b>                      |                                      |                         |
| STAT5                             | SPU_015108 (E)                       | <i>Sp-STAT</i>          |

(1) Two or more model IDs have been assigned to the same gene due to any of the following reasons: a) They represent duplicated models of the same gene; b) They correspond to both alleles of the same locus; c) They contain partial fragments of a gene broken up into more than one model..

(E) indicates embryonic expression of the gene model as indicated by hybridization of pooled RNA samples from egg, early blastula, gastrula and prism stage embryos to a high-density tiling array of the *S. purpuratus* genome (Samanta et al., 2006)

Table S5 (cont.) - Full list of immunity-related transcription factors

| <b>TF Family</b>                  | <b>Gene model ID</b>                 | <b>Assigned name</b> |
|-----------------------------------|--------------------------------------|----------------------|
| <b>Nuclear Receptors</b>          |                                      |                      |
| RARalpha                          | SPU_018366                           | <i>Sp-RARa</i>       |
| RARbeta                           | SPU_013178                           | <i>Sp-RARb</i>       |
| <b>SOX Hmg Box</b>                |                                      |                      |
| SOX4, SOX11, SOX22, SOX24         | SPU_002603 (E)                       | <i>Sp-SOXC</i>       |
| <b>T-BOX</b>                      |                                      |                      |
| T-bet                             | SPU_025584 (E)                       | <i>Sp-Tbr</i>        |
| <b>FORKHEAD</b>                   |                                      |                      |
| FoxP1,2,3,4                       | SPU_009876 (E)                       | <i>Sp-FOXP</i>       |
| <b>SMAD</b>                       |                                      |                      |
| SMAD4                             | SPU_004287 (E)                       | <i>Sp-SMAD4</i>      |
| SMAD2,3                           | SPU_017642                           | <i>Sp-SMAD3</i>      |
| SMAD1,5                           | SPU_020722 (E)                       | <i>Sp-SMAD1</i>      |
|                                   | SPU_023107 (E)                       | <i>Sp-SMAD5</i>      |
| <b>DEAD RINGER/BRIGHT</b>         |                                      |                      |
| Dead ringer                       | SPU_005718/025601 <sup>(1)</sup> (E) | <i>Sp-deadringer</i> |
| <b>POU Domain</b>                 |                                      |                      |
| Oct1, Oct 2                       | SPU_009262 (E)                       | <i>Sp-Oct1-2</i>     |
| <b>MYB</b>                        |                                      |                      |
| c-myb                             | SPU_000861 (E)                       | <i>Sp-Myb</i>        |
| <b>Transcriptional Co-factors</b> |                                      |                      |
| LMO1/2                            | SPU_013569                           | <i>Sp-Lmo2t</i>      |
| FOG1/2                            | SPU_010168                           | <i>Sp-FOG.</i>       |

(1) Two or more model IDs have been assigned to the same gene due to any of the following reasons: a) They represent duplicated models of the same gene; b) They correspond to both alleles of the same locus; c) They contain partial fragments of a gene broken up into more than one model..

(E) indicates embryonic expression of the gene model as indicated by hybridization of pooled RNA samples from egg, early blastula, gastrula and prism stage embryos to a high-density tiling array of the *S. purpuratus* genome (Samanta et al., 2006)

## LEGENDS TO SUPPLEMENTARY FIGURES

**Figure S1.** Structure of the sea urchin TLR types. **(A)** Representative typical sea urchin TLR of “vertebrate-type” structure (Sp-Tlr082, SPU\_015303). **(B-C)** Two sea urchin TLRs with protostome-like structure: **(B)** Sp-Tlr066 (SPU\_011823) and **(C)** Sp-Tlr041 (SPU\_007859). **(D)** Structure of a “Short-type” TLR (Sp-Tlr159, SPU\_001458). Box colors represent the following domains: Pink, signal peptide; red, LRRNT; blue, LRRCT; gray shading, transmembrane region; green, TIR domain. Amino acids highlighted in yellow denote consensus LRR hydrophobic residues. The consensus sequence is shown in (A).

**Figure S2.** Analysis of TIR domain sequences from sea urchin protostome-like TLR genes. **(A)** Phylogenetic tree of bilaterian Toll-like receptors. One Sp-Tlr is represented from each subgroup. Red genes denote protostome-like LRR pattern (see text), while blue genes denote vertebrate-like LRR pattern (single LRRNT and LRRCT flank all LRRs). All protostome-like TLR gene TIR sequences cluster together. This protostome TLR clade includes the TIR domains from the three sea urchin protostome-like TLR genes (shown in black ovals). *Caenorhabditis elegans* and *Nematostella vectensis* have only one TLR gene each and they are of the protostome type. A small divergent subclass of Sp-TLR genes with very short extracellular domains does not clearly cluster with either TLR class. **(B)** Alignment of C-terminal region of the TIR domain. TIR domains are composed of five  $\beta$ -sheets and five  $\alpha$ -helices alternatively spaced (three of which are here denoted with green boxes). The region between the fifth  $\beta$ -sheet and  $\alpha$ -helix is shorter in protostome-type Toll genes than in vertebrate genes (Rock et al, 1998). A

diagnostic gap after the fifth  $\beta$ -sheet is denoted by a shaded box. The three protostome-like Sp-TLR genes have shorter  $\beta$ -sheets than those in vertebrates and other Sp-TLR genes, and hence both the extracellular LRR motifs and cytoplasmic TIR domain structures exhibit affinities with the protostome-type TLRs.

**Figure S3. Variation in LRR sequence among closely related TLR sequences. (A)**

Typical single amino acid substitutions and smaller insertion/deletions. These mutations are seen within LRR motifs. **(B)** An example of larger insertions flanking LRRs. TLR subfamily Group III has the largest insertion (16 amino acids) of the Sp-Tlr genes. Some gene models have a cysteine pair within the insertion. A smaller insertion is located at the end of LRR 5. **(C)** An unusual insertion of complete LRR motifs found in one sea urchin TLR subgroup (Group IB). The number of inserted LRRs (1-3) varies in closely related genes. The amino acid sequence is highly similar among inserted LRRs. LRR number designations are taken from the related Group IA which does not exhibit this type of insertion. Shaded amino acids denote insertions. Blue boxes delineate LRR motifs. Red residues denote conserved patterns of LRR hydrophobic amino acids.

**Figure S4. Domain structure of representative Sp-NLRs.** Sp-NLR protein sequences

from Cluster 1 **(A)** and 2 **(B)** are shown with the different domains boxed in pink (DEATH), yellow (NACHT) and black (LRRs). The sequence in B is that of the GENSCAN prediction (Supertig112651\_2: 4,654 -20,780), which has two DEATH domains; the Glean3 prediction has a single DEATH domain. LRRs that were found through a HMMER search using the Pfam LRR\_1, LRR\_2 and LRR\_3 consensus sequences are designated. However, several other sequences related to the core LxxLxL

sequence can readily be identified. The LRRs in these genes are encoded in complex exon/intron structures that are poorly represented in the gene predictions. Nonetheless, clear evidence of their presence can be found in multiple gene models within each cluster of the phylogenetic tree (Fig. S5).

**Figure S5. Neighbor joining tree of sea urchin NLR genes.** This tree was constructed using 193 NLR NACHT domain amino acid sequences. Clusters referred to in the text and in Table S3 are indicated. Numbers indicate bootstrap values.

**Figure S6. Expression analysis of NLRs from clusters 1 and 2.** Quantitative PCR was performed as described elsewhere (Fugmann et al., 2006) on cDNA from adult tissues, including unseparated coelomocytes and coelomocyte fractions. Degenerate oligonucleotides that recognize a conserved region of the NACHT domain of gene models from clusters 1 and 2 were used as primers. TF: tube feet, OE: oesophagus, M: mesentary, GUT: gut, TE: testis, OV:ovary, C: coelomocytes, P: phagocytes, V: vibratile cells, CS: colorless spherule cells, RS: red spherule cells.

**Figure S7.** Phylogenetic tree of the thioester protein family. A pairwise alignment method was used to align the sequences in ClustalX (Thompson et al., 1997) and subsequent editing was done by hand using Bioedit sequence alignment editor (Hall, 1999). A consensus tree constructed in PAUP\* (Swofford, 2002) using maximum parsimony method with 1000 bootstrap replicates is shown as a phylogram. The horseshoe crab  $\alpha_2$ macroglobulin sequence was chosen as the outgroup. Similar

cladogram results were obtained using a maximum parsimony method in MEGA3 (Kumar et al., 2004), and a Bayesian method in Mr. Bayes (Ronquist and Huelsenbeck, 2003). The Bayesian method was used with default priors and a GTR gamma-distributed rate variation across sites and with a proportion of variable sites. The cladistic grouping of the sea urchin sequences, Sp-C3, Sp-C3-2, TCP-1, TCP-2 and Sp-a2m were the same using PAUP\*, Bayesian and MEGA3 methods. Although the tree shows support for a separate clade that includes all invertebrate C3-like sequences with the exception of the protochordates, it is likely that this is an artifact caused by the limited number of invertebrate thioester proteins, and that these genes are orthologous to the vertebrate C3/4/5 genes. Furthermore, the placement within the tree of  $\alpha$ 2m from *Ciona* and sea urchin plus TCP-1 and -2 may be due to long branch attraction based on the elongated 3' end of these sequences. Whether these gene models are correct will require additional investigation. Amino acid sequences were collected from GenBank or the Sea Urchin Annotation website: C3 coral, *Swiftia exserta*, AY186744; C3 sea urchin, *Strongylocentrotus purpuratus*, AAC14396; C3-2 sea urchin, *Strongylocentrotus purpuratus*, SPU\_000997; TCP-1 sea urchin, *Strongylocentrotus purpuratus*, SPU\_022988; C3 amphioxus, *Brachiostoma belcheri*, AB050668; C3 halocynthia, *Halocynthia roretzi*, AB006964; C3 mouse, *Mus musculus*, P01027; C3 human, *Homo sapiens*, NM\_000064; C3 hagfish, *Eptatretus burgeri*, Z11595; C3 lamprey, *Lethenteron japonica*, D10087; C3 cobra, *Naja naja*, Q01833; C3 chicken, *Gallus gallus*, I50711; C3 grass carp, *Ctenopharyngodon idella*, AAQ74974; C3-1 ciona, *Ciona intestinalis*, AJ320542; C3-2 ciona, *Ciona intestinalis*, AJ320543; C3 horseshoe crab, *Carcinoscorpius rotundicauda*, AAQ08323; C4 xenopus, *Xenopus laevis*, D78003; C4

mouse, *Mus musculus*, P01029; C4A human, *Homo sapiens*, K02403; TCP-2 sea urchin, *Strongylocentrotus purpuratus*, SPU\_005198; C4 medaka, *Oryzias latipes*, BAA92287; C5 human, *Homo sapiens*, M57729; C5 mouse, *Mus musculus*, P06684; a2m mouse, *Mus musculus*, Q61838; a2m human, *Homo sapiens*, NM\_000014; a2m horseshoe crab, *Limulus* sp., D83196; a2m lamprey, *Lethenteron japonica*, D13567; a2m sea urchin, *Strongylocentrotus purpuratus*, SPU\_013170; a2m ciona, *Ciona intestinalis*, CAD24311.

# A

Sp-Tlr082

1 MANGSILYQLLVACLLVSSFFQSFHRHDGDSEMPFLTLDMKSFHGCDCN 50  
 51 LELKEVSCSNKGLTVPQNLSE 72

(consensus) xLxxLxLxxNx+xxx+xxxxFxxLx  
 (LRR 1) 73 DTEVLDLSSQNNITKLFNFSFEVYV 96  
 (LRR 2) 97 VITSLDTSNDVRAIESAAFYPLK 120  
 (LRR 3) 121 ALRFLYLVFNRLVLPATGVFMSS 145  
 (LRR 4) 146 QLSILDLTSLYGLSPNDILKWSV 169  
 (LRR 5) 170 HLDVARLSFNELSSINVSSCG 190  
 (LRR 6) 191 MADNWIMLGNQIHLTSLDFTFVC 214  
 (LRR 7) 215 HDTTLDIREMPVQSDPDVVASL 237  
 (LRR 8) 238 HVRSLVIGCNPLSYEVLANIILGISKS 264  
 (LRR 9) 265 DIERLITTEGSGTGAFFVGVFTDLRDS 290  
 (LRR 10) 291 SLTALAFTRNDLNSLYPLVFSNLT 314  
 (LRR 11) 315 KKKQFSLSANQIPIDEIQPDFDGMN 340  
 (LRR 12) 341 ELKELIKNNVQVQINPHNQWTV 364  
 (LRR 13) 365 DLSEFDLSSGNLPTESAFVFRGLR 388  
 (LRR 14) 389 NITFDLSSNVELSVFELMAFSGLD 413  
 (LRR 15) 414 NIQTIVLTGTRKVLLENTFRRL 436  
 (LRR 16) 437 SLFLMNTLYGSRLLFTPGESFQHLQ 460  
 (LRR 17) 461 SLLNLDMMKSDIRYDLDNDINTSLFHRIL 491  
 (LRR 18) 492 DLIHLDLSSNPLFSIMEIPTGIFQQLS 519  
 (LRR 19) 520 VLQELNLDYCDITNHLPLVESGLE 543  
 (LRR 20) 544 SRRKLSLEGNNQIHTHDDVLSGLG 567  
 (LRR 21) 568 QIQSINFDGNWYLAYLEVIFRSNMW 591  
 (LRR 22) 592 KLTNLSLADNRILTRLNQSTKPLIF 615

616 SSISSLDLVSNPIDCNELKWLIDWLNPIRLKNKDKTICSSASLEPLRE 665  
 666 KPLLDLDFPNELELNNVYLLPLIPLAFSLVSVLLVYRWQLRYKVNLL 715  
 716 KLAVLGYKEMRDARDHNDYEFVNVNIFFYDDDEEWIREQLRPALEERLPQF 765  
 766 QRVNFGDEDLVLGMHYLDSVYVVSWSHYKTIIVLSRAAVHDHWFILKFRV 815  
 816 AMDHVSDTLTVVIVVLELDIIPDEMEFLARLYLSDGRPYIHWNNVVRGQ 865  
 866 EYFWDKLTNNLTIILRTNDLIPNE 889

# C

Sp-Tlr041

1 MGIPIKQFLLTILLNLISVCVGEHVNSAIFTFYVIECPVVPLTGNSS 50  
 51 QCDDPPNITVTDTSLAAQYVVSCKLTPELISATNPDPFYFRSRRVYID 100  
 101 CSWNNLSYSGFLMSAVKBCGDIAEEVDFPGDVDCFTFPNITADTYMGLP 150

(consensus) xLxxLxLxxNx+xxx+xxxxFxxLx  
 (LRR 1) 151 SIQKLTLALEDGISIKPDAFSPK 174  
 (LRR 2) 175 NLEVLSIVQLDLKSLHPEVFRGLT 198  
 (LRR 3) 199 HLRQLSIVWDDIRELPDGIENDLQ 222  
 (LRR 4) 223 DLQVLSRSNSITHSRDLKFL 246  
 (LRR 5) 247 FLNTLYLDDNNISSIHADAFRSMR 270  
 (LRR 6) 271 SLEEVDLSSRNLDKFPSSFL 291  
 (LRR 7) 292 CTEKLLLSYNSLTSFTEDTVPGVRG 316  
 (LRR 8) 317 YTSLSLDSHNLSSISGESVQTDLELLS 343  
 (LRR 9) 344 SLSYVLRNRRLESLPTNVLRWAR 367  
 (LRR 10) 368 RLTFIDLSYNSLETLDHGLFDIQS 391

392 NPLGEQRLAGNLVLRGNSPFTCDRLTFWFRYDGDVWISDRDDIECF 441  
 442 SPFNNGIPLFSIRPEHFECHLSDSLCEPHCQCYEVMKDLGLQTPRRVIN 491  
 492 VECESENLRIPRGIENSSLDLTGNIWNTRKSMLDTRMF 533

(LRR 11) 534 FLSDLTITRCSIVRIESGARLLN 557  
 (LRR 12) 558 SVLQKLDGNNERNITKGTFOGLT 581  
 (LRR 13) 582 RINTLYLHSSIRTITADGVFLDTP 605  
 (LRR 14) 606 SLYLYLHGNFTVLPALQHFQCS 629

630 LEIVSLQENPLTSCNLSLQGLVKYILEVKGNTCRERDGTYSANLND 679  
 680 SSYCRKHGTSPLLAPLASLGAITGVVVVLCVFLYKKNKTLFQMLLRY 729  
 730 FPQDLEDDANKFPDFVISYQQLDDEFVLRVLPLETEDEPFSYICLHH 779  
 780 RHFVPGDTIANNIVSAVAQSRRLVILSDNPLQSDWCMYEFMAHLQALH 829  
 830 DRRNTLLIITLGDISQDSLDPDLKAIYRITRTYLESFDSKFNKFLALKR 879  
 880 GRSIQRTARNQIKLVDFDGI\* 900

# B

Sp - Tlr066

1 MATEVHSTKTRLCCLCVFVLLSMIPATFSLSCNVDPDLPLCEGPTQSGSD 50  
 51 HIEYHRITCFLTGEWNVITIGVILPLTRSLILSCSHGGNGTEEPADLKEDLF 100  
 101 HKFAG 105

(LRR 1) 106 VLQNLTMRRCKIGNLPTEIFTDLI 129  
 (LRR 2) 130 LQRLLLTSVDLNGERLSAIGGIKT 154  
 (LRR 3) 155 NASVKLYSNKLSLNSDSFNGYFS 178  
 (LRR 4) 179 NVSSLDLYSNSVQIIGNGTAFAMFP 202  
 (LRR 5) 203 SLRKLFLGNNTISVVKEGAFSGLO 226  
 (LRR 6) 227 RLSELNVRGNPSMFDGWSCLFKNVP 251  
 (LRR 7) 252 FLTTLDVSTFTLTNATQFNCAPLV 275  
 (LRR 8) 276 HRRLLIHDNNTKLDGVSFALMP 299  
 (LRR 9) 300 NITFDVSNNDLEYIHSSAFHGCLN 324  
 (LRR 10) 325 GLNHVDMSGNHLRDFPILAFESTP 348  
 (LRR 11) 349 NIKSINISYNYLRVKKKGTFSGQA 372  
 (LRR 12) 373 SLQITDLSFNRLHTIDMFGFVALD 396  
 (LRR 13) 397 NITMIDLRHNNATFENNVVWFPD 420

421 IQPPHIPIKTFLQNNFNFCGCHWMFYIRRGFKDTYFFLSDNSTWTCK 470  
 471 AFSVPANKPMMTLPLEDFWCFYVYNDACRRGSCCEYSRDVDEANVFCNN 520  
 521 NTMHSLNFPANTFMFECDGLIDDQVTLQVGAFOASA 558

(LRR 14) 559 RLTFVVLQDGLERLPLGALQEP 582  
 (LRR 15) 583 NLQQLDVSYNVNTFSDDIITNLT 606  
 (LRR 16) 607 HLHTVDSLNNRNSLNSNTFATNL 630  
 (LRR 17) 631 NITTVKLHSHNKLTLDDGVNSNT 654

655 YLEVLTLHNPFFVCNCSLFWLQWLOSHLDVVPOLYDVKCVVNSNFDLY 704  
 705 PTIQVADLDFGCYNPVDLTVQYNAVIVSSTLTLFLMVGAVTFRRHRAI 754  
 755 RVILYTRYGFVHLDDDDVLDNVRVYDAYIAYSDEDIQVLENITIF 804  
 805 ILEDDNLRKLCVHRHDFPPGGCIATTIVTSLEASRSIVLISRSFLQD 854  
 855 EWRLLFEFTAQRVLKDKRKNLILVLEDLTKDEMDDMRYVVTANAYL 904  
 905 STDRFLRENLLYEMPRRPLCFIHGDVDER\* 935

# D

Sp-Tlr159

1 MNIGKNIVIEITFLGICYLLFVGRVRSVSFCDDFDCYPPDILCSGVDFTE 50  
 51 ALNNTIPDEVANTSELELIFDETLRLGNDTQPSFN 86

(LRR 1) 87 TLQRIVLDHCPVTFVSEFVEGLN 110  
 (LRR 2) 111 ELRYISLTLNSLTVPIKALSRLKT 135  
 (LRR 3) 136 PHEELHLVHQITNIPANSEAFQ 159  
 (LRR 4) 160 SLHKLTKYFNHDLDISANAFASRA 184  
 (LRR 5) 185 NLTHLYLSNNGIRLHDTTEMLH 208  
 (LRR 6) 209 NLQELDLSYNLFAVPTAHAKK 231  
 (LRR 7) 232 SLKKLDLSHNQLLDNLRNLLFLVMP 257  
 (LRR 8) 258 KLTLEMGSCLSEISSDAVDNLM 281

282 TSKDLAVANFDNPFNCTKDLCSFASWYLSLPEPSTTRSPYIIPFITVS 331  
 332 PPPGKGPYRCKSSGQPLLEFYNSYCIAPDLTPSNVDPDADDSTPWYA 381  
 382 VVFTLIPVAFLVIVSEVWKKFRILINQYHHFGIHPORRANNGAVQRNN 431  
 432 FEYIFDAYVSHHEDDKFPVQDEMLPRLEDENGFDLCLSFNFRNLG 481  
 482 NVSSAQDVSRAVIFIINERFMQNGQCKLELEMASTRLEDEMDHGVRLL 531  
 532 LILMEVLEPDLMNNTLRMLLNHVAYLEWDPTEVDRCVGOLIAIATLRTVPE 581  
 582 GNSDDERGANDEQNAQDEPLCNQYEQHV 609



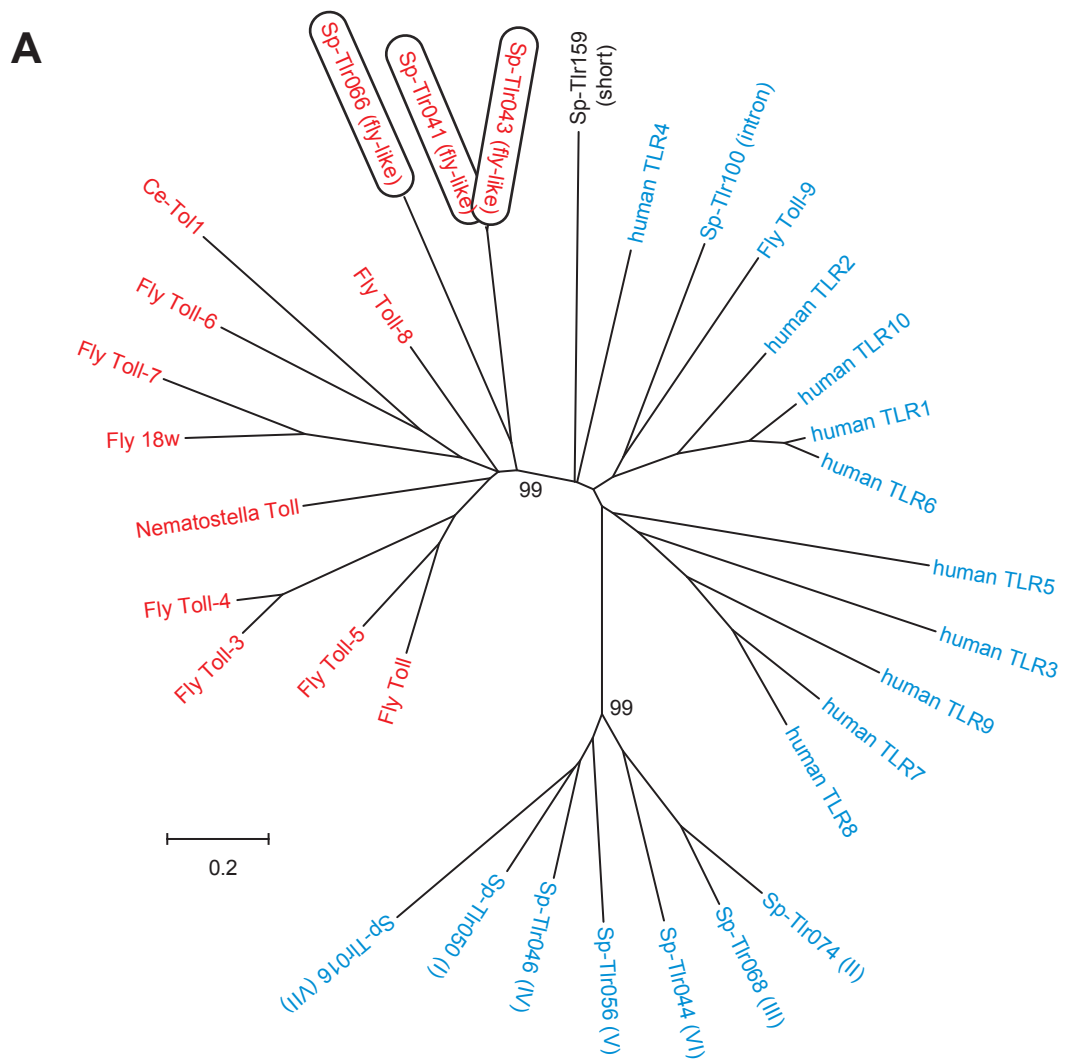

**B**

|                             |     |         | <b>α-helix 4</b> | <b>β-sheet 5</b> |        | <b>α-helix 5</b> |               |           |     |
|-----------------------------|-----|---------|------------------|------------------|--------|------------------|---------------|-----------|-----|
| <b>Sp-Tlr050 (I)</b>        | 843 | ...EMPF | LARLYLSDGR       | PY               | IHWTE  | V-RGQE           | YFWEDELTKDLTI | -NLRTNDLI | 889 |
| <b>Sp-Tlr074 (II)</b>       | 889 | ...NLPY | LVRLFLSRNR       | PY               | MLWTED | -EDRQE           | LFWAQFEKSTRA  | -NRAINNAI | 935 |
| <b>Sp-Tlr068 (III)</b>      | 867 | ...NLPY | LVRLLLSRNK       | PY               | LLWVFD | DEDGQE           | LFWAKFEKNMRA  | -NREMNNVI | 914 |
| <b>Sp-Tlr046 (IV)</b>       | 823 | ...ELPF | LVRLYLSDRK       | PY               | LSWEEE | EERFQE           | YFWQKLIKMLKM  | -NLRCNNVI | 870 |
| <b>Sp-Tlr056 (V)</b>        | 817 | ...ELPF | LIRLFLSDHR       | PY               | LVWPDD | -ERGQE           | YFWEELIRDITV  | -NIRCNHLI | 863 |
| <b>Sp-Tlr100 (intron)</b>   | 805 | ...TKYY | KLHKVMMKRT       | -Y               | LKWPM  | PGVQRN           | DFWMKLTVLRE   | PELRINNNV | 852 |
| <b>human_TLR1</b>           | 741 | ...SSYH | KLKSLMARRT       | -Y               | LEWPKE | -KSKRG           | LFWANLRAAIN-  | --IKLTEQA | 784 |
| <b>human_TLR4</b>           | 780 | ...RQOV | ELYRLSRNT        | -Y               | LEWEDS | -VLGRH           | IFWRRLRKALLD  | -GKSWNPEG | 825 |
| <b>Fly Toll19</b>           | 853 | ...KRPK | TLQYLM DVKT      | -Y               | IKWPTA | -KEDRK           | LFWKRLKRSLEV  | IGINSREIS | 899 |
| <b>Sp-Tlr159 (short)</b>    | 542 | ...LMNN | TLRMLLNHVA       | -Y               | LEWDPT | ---VED           | RCWGQLIATLRT  | -MVPEGNSD | 585 |
| <b>Sp-Tlr041 (fly-like)</b> | 847 | ...SLDP | DLKAYIRTTT       | -Y               | LESFDS | -----            | KFKNKLFALKR   | -GRSNQRTA | 887 |
| <b>Sp-Tlr066 (fly-like)</b> | 889 | ...EMDD | DMRYVVTANA       | -Y               | LSTTDR | -----            | LFRENLYEMPR   | --RPLGEIH | 928 |
| <b>Fly Toll</b>             | 894 | ...KLDE | ELKAYLKMNT       | -Y               | LKWGDP | -----            | WFDKLRFALPH   | -RRPVGNIG | 934 |
| <b>Fly Toll13</b>           | 749 | ...SLDS | ELRTYMAFNT       | -Y               | LERSHP | -----            | NFWNKLIYSMPH  | -TKLR     | 785 |
| <b>Nematostella Toll</b>    | 821 | ...TLDD | ETKLYLRTNT       | -Y               | LSVSNK | -----            | WFWQKLFYALPK  | PLAPPQSYE | 862 |

Hibino et al. Figure S2

**A**

Group IV

|           | LRR2                                           | LRR3                                              | LRR4                                          | LRR5                                          |     |
|-----------|------------------------------------------------|---------------------------------------------------|-----------------------------------------------|-----------------------------------------------|-----|
| Sp-Tlr039 | 91 R K N L N I S Y R L L E I A T G S F Y D M P | M L Q Y L D L S Y N W F L K S I T S Q M F K F S I | N L S H L I L F A T D L E S V P G D I R W L P | N L Q L D L S Y N V M I S H I N I T S C S S K | 188 |
| Sp-Tlr046 | 91 ..K.T.T.S.R-.....L.T.                       | .....N.SF-.....L.                                 | .....AS.R-.....D.                             | H.R....R-..D....V.....                        | 185 |
| Sp-Tlr149 | 90 .....T.A..S-.....T.                         | .....T.....C.....                                 | .....GP.Y-I.TI.S.....                         | .....IT-STT.....                              | 184 |
| Sp-Tlr045 | 91 W.....T.T.E..S.....T.                       | .....N.S-R.....N.A                                | .....N.GS.A-K.....                            | .....F..R-GHQ..S.....                         | 187 |
| Sp-Tlr096 | 95 .LRI.SLF.YIE-.GI..HS.                       | D.EN..GF.DN.-...E..RI.T                           | K.AY.SFDGDLA..FI.S.....                       | ..RI.N.N-DTA.Q...T...P                        | 191 |
| Sp-Tlr097 | 89 ..K.SLY..DIK-G..PTA.QS.                     | E.....GR.YY.SCFK.EI.RP.K                          | K.....SFSGSP-MREI.N.T....                     | S..M.....-ETDLRY..V..N.A                      | 194 |

**B**

Group III

|           | LRR 3                                               | LRR 4                                                                     | LRR 5                                               | LRR 6                                       |     |
|-----------|-----------------------------------------------------|---------------------------------------------------------------------------|-----------------------------------------------------|---------------------------------------------|-----|
| Sp-Tlr119 | 109 L L K V L R L R H N S I N V L P I S L L E K N V | H L S S I I L H H N I E G I P H I V G N N L Q T T Q F A E D G E N A C C K | N N S R F D L S F N K V G S L E Q G D F V A L R N C | S F D R F N L N N D I K S L S R A V T D L Q | 221 |
| Sp-Tlr112 | 109 .....M.NH.N.SA.....C                            | .....L.N..R.KR..R.F.....K.....D.....                                      | .....L.....S...R..V.E.....Q...                      | ..K.....Y....NI.....S                       | 221 |
| Sp-Tlr068 | 109 .....M.DH.N.S.....C                             | ..Y L S..Y..K.KR..L.F.....Y S K N..D.....                                 | .....L..Y.A.E.RL.K.....                             | .....D..H.....P.....P                       | 221 |
| Sp-Tlr005 | 111 Q.Q..D.DH.L.TF...YY.Q.A                         | L.YI.N.S..K I S N.S G S L V S T Q N-----G.FY.WR                           | ..A V V.....L T I K E...L P W...                    | ..V R K..V.D.N V T F E P K A.G N.P          | 216 |
| Sp-Tlr053 | 112 Q.QD.K.DH.L.TF...YY.Q.A                         | ..C I .N.S..N I S N.S N T L V S T Q K-----C.CY.WR                         | ..A V V.....F T I N .D..L P W...                    | ..V K..D.N V T F I Q S K A.G H.P            | 217 |
| Sp-Tlr211 | 111 Q.Q..K.DH.L.TF...YY.Q.A                         | ..V I .N.S..L I S E.S S T L V S A Q K-----C.R.LN.WR                       | ..A V N.....L T T I N E N..L P W...                 | ..F V N K..I.D.H V S F Q P K A.R Y.P        | 216 |

**C**

Group IB

|           | LRR ex1                                             | LRR ex2                                         | LRR ex3                                         |     |
|-----------|-----------------------------------------------------|-------------------------------------------------|-------------------------------------------------|-----|
| Sp-Tlr035 | 308 R L V E L D L S V N K V Q S L S P Y V F S N L T | R L V E L D L S C N K I Q S L S P Y V F S N L T | R L V E L D L S Y N K I Q S L S Q Y V F S N L T | 379 |
| Sp-Tlr069 | 309 ..K...H.E.P.....                                | .....E.K...P.....                               | .....E.K...P.....                               | 356 |
| Sp-Tlr134 | 309 .....N.E..V.....                                | .....D.....P.....                               | .....D.....P.....                               | 356 |
| Sp-Tlr077 | 310 .....H.....                                     | .....H.....                                     | .....H.....                                     | 357 |
| Sp-Tlr031 | 308 .....N.E.K..P.....                              | .....N.E.K..P.....                              | .....N.E.K..P.....                              | 331 |
| Sp-Tlr048 | 309 .....                                           | .....                                           | .....                                           | 309 |
| Sp-Tlr049 | 310 .....                                           | .....                                           | .....                                           | 310 |
| Sp-Tlr075 | 311 .....                                           | .....                                           | .....                                           | 311 |

  

|           | LRR 10                                              | LRR 11                                            | LRR 12                                        |     |
|-----------|-----------------------------------------------------|---------------------------------------------------|-----------------------------------------------|-----|
| Sp-Tlr035 | 284 S L S V L R L A G N K I Q F L S P Y V F S N L T | 380 R L V E L H L S Y N E I V T V E P V F Q G M R | E L K V L N L K K N I K Y I N P N T D V W A L | 427 |
| Sp-Tlr069 | 285 .....TL.QV.S.....                               | 357 .....D.S.D..SI.....                           | .....NY.Q.....E...                            | 404 |
| Sp-Tlr134 | 285 ..TL...S.....S.....HF.                          | 357 G....D.Q.K.....Q                              | .....N Q.K L.....V                            | 404 |
| Sp-Tlr077 | 286 .I.....FMF.V.S.....W.                           | 358 .....D.V.V.....I.....Q                        | .....N S.E.....V.                             | 405 |
| Sp-Tlr031 | 284 ..T.....TWT...S.....                            | 332 .....D.S.K.....I.....                         | .....N F.E.....P.                             | 379 |
| Sp-Tlr048 | 285 ..TL...S.E.S.V.....                             | 309 .....D.Q.K.....I.....                         | .....T Q.EL T C...I.E.V.                      | 356 |
| Sp-Tlr049 | 286 .PP..K F T..N L.S.Q.....                        | 310 .....D.R.K.I.....                             | .....N F.Q.....E.T.                           | 357 |
| Sp-Tlr075 | 287 ...L..F T E..L.S.....                           | 311 .....D.Q.Q.....                               | .....I..M N S.K.....V                         | 358 |

**A**

SPU\_017196 Sp-NLR-132

MARQCGIVDGLLSQLAEDIETGEQLEALGRALGFKAAAINRYTDTNNKGD 50

RVTCKGTRDMLFNWRQTVVEPCDQHLRLKKAFLDAELVMLADTYIKGTPSI 100

RDIPSEKISESLTVEQCGEKLKNKYLHELCKIQMKPDKNAYAEFKDMHT 150

MVTMVKKAHAGQDTKIKEILQGSVSDIFSTKVNGLIFARILISAPAGRKG 200

TTAVAKMAYDWHRQKGSALHLLPFLVVKFRNTGQLTSIGEAITSQLLS 250

DVHDLTPEDLESFIRKNQGICHIIIDGLDEYAGIPSTNRGLMSNIVNVIR 300

WEEFPQCRVLVTRPHLENNFNQAEIPRVYTKMIEGFRESRSSDYIDKF 350

FALSSNPNSGRRLKVYLDIQPLINELVKTPHCLMVCHLWSNGLLDSGTT 400

TQPELSDSVNFMQYTNARSESRVKITPKMLRKIILKLGVAULTGLLDD 450

VKQLVFTPHDFRRVPAILDLACELGII SKTTVSSSTCLPQSNETTSTTIEF 500

YHKIAQEHSAKGFVADQTYNLLHFVKSKLDRLVRKIKANIGDENLIRF 550

AAGTDNNVCIRIMEVLLTKTFDESEYRILLDCSSETTSTDCNVTTVKL 600

KGSTLTSDVTSGVWSVLGFSMLRFLTISDSLSFPPSPPELPSVRKLSA 650

ERLTSQSYEGLLSSLPGLRDIITIDDAERDIPQIMAGLRRTGGHSKNLK 700

CLDEQDLVKLVESSTYLIALDSLHLQPLDCGCCFEYDRELGVQVTTCTRLST 750

EITAKMWSCLRTFSLKHLTISDSLSFPPSPPELPSVTKLSTERVTSQS 800

YEGLLSSLPGVKIDITIDDAERDIHQITAGLRRTGGQQLTIRLEAPSS 850

LPSEKKSSTVETMRGLSHLRKQTNLLEFWLSRVNCRKEEDLVLEVESL 900

RHVKTNLHLIILCGCTKTGGTLEHRHVKLLISQKSIMVIVLHDNGQLVNV 950

NCQLSSEITVRIWCSLRSFSLNQLTISDSLSFSPFPMPLPSVTHLSLTE 1000

RVTSSQSYEGLLSSLPVGEVIGDITIDDPERDIPQITAGLRRTGGQQLTHIE 1050

LTAPDSLTLTWNLVSRRETMGLSLLIKEKTHNLKRLDLRWVTCODEEEF 1100

VDLLWCCFHVKTLLEEMV 1117

**B**

SPU\_025680 Sp-NLR-7

MNNILLRSGDVERNPGPNPNPILTELELYLLADGMDFRKFVGLALG 50

STEAQLSRFEKDKPGNSMGATYQMLYEWKRTVQSEARDILVNKLDSEIKL 100

VQLADSVRRVQFRLLIISHHCTLSLTMKYVYGEHLDTMVPVSLGWRVR 150

IGTFIRRRKKEVDYNYFSSKLFNLIKRAKNVQSPENNSECNTPQSRSQF 200

DGPECDVVKESGSCDVKSPGPNVSHSESSCAENSSYPTANETNPLHDT 250

TDVQNPDPFRPCTEDTVDDKNIAINLMSPEYPTKSSQISKTDQPEVGTSES 300

YSHVPAVVPGEPARIKLHKEETSNSAPSRIEDQSLGLSPTPRQDTRNTK 350

QTPPSIKKVTEYHGSPTCPLLGSGINSGEADAIKNGCPCDMSNILLRSG 400

DVERNPGPNPNPILTELELYLLADGMDFRKFVGLALGSTEALSRFE 450

KDKPGNSMGATYQMLYEWKRTVQSEARDILVNKLESIELVQLADSVRRV 500

LPRSQYVQTKLTSLSLHFRNTFIMGPKNCNSVRSTSI SFKNGFGRIGNQIE 550

LVFDGYRLTTDWLELPGNDKLLRVLQPPVLRFSRTVPIRSQVGDHIPS 600

MTEEEDRVAEDVKRYLALLLQIADPLNSELLAFERIIYTNLTLMEED 650

KGTKRKTALLYDGLGTVNGIYFKRLLVEGEGGVGKTFCAKIAWDWIH 700

GKGYKDFKLVLVLLREAKDKTVGEVVKSYLSDNNPVTAQLDKVILSNP 750

DHVFLVLDGLDEFAVDLNSTQQIALITHNRLFKSGTCLITSRQWRSDAIR 800

KNAYLRKVFAFIAIEGFSPENLSSYITKFFHPDKASSEDLSRFISNNAVI 850

RENMAPYPIYTAMLKIMWKEFDGERREAMSKLQTFSQLDEMVRFLVDHY 900

LSKLTVPADADEKLDENRSEILNHEIYIGCVAFQGLLKRRLVFSEEEFQ 950

SCPGSDVTGCKVGLTKEKHIPRRRRRHHSHSAGLAVQPHKLFQEYLS 1000

GMYLAFYNSNRNEYDKLIANIIPKAEERYLYLYFTAAQQKEIGLDIVSL 1050

LIRSKSEHRPTENFIVDVAFESQDQSVAKSVADHLYRYPGKTLBITGKMQ 1100

VHTVSGHIFVMNHREPDDLIRGRGRTVSEDLAEFICSSRSRFLVAIVH 1150

VIHDVYSVLANKAVDSKMETLHTQLDLDLKERPAASRDLAQFICKMPLK 1200

KLTLRYIGRMHDAFYSTLSEASSAKIETLDTQLDLDLSEPAASRDLAQF 1250

FCKMPVILKKLTFRCGGLMHDDFYSTSSMAASAKIETLAIQLDLDLSEPF 1300

ASRGLAEFFICKMPEHLKNTLYQESWDNYKLDHDAFYSTFSSMASSKV 1348

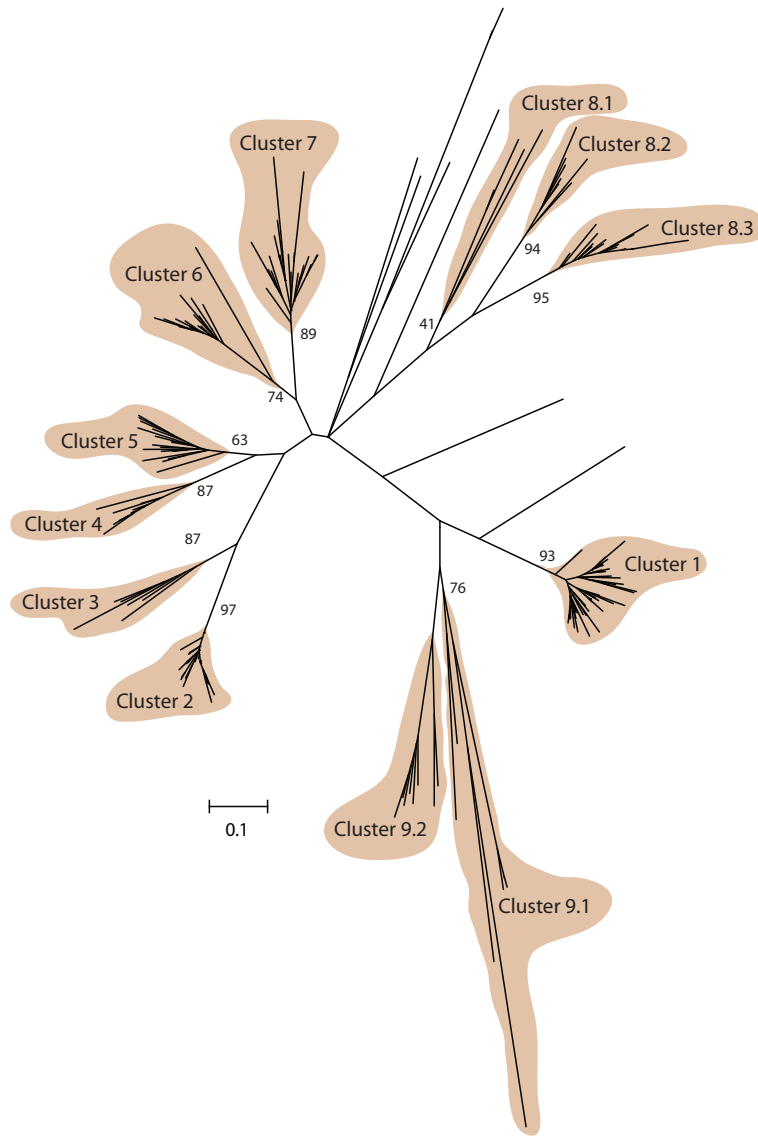

Hibino et al. Figure S5

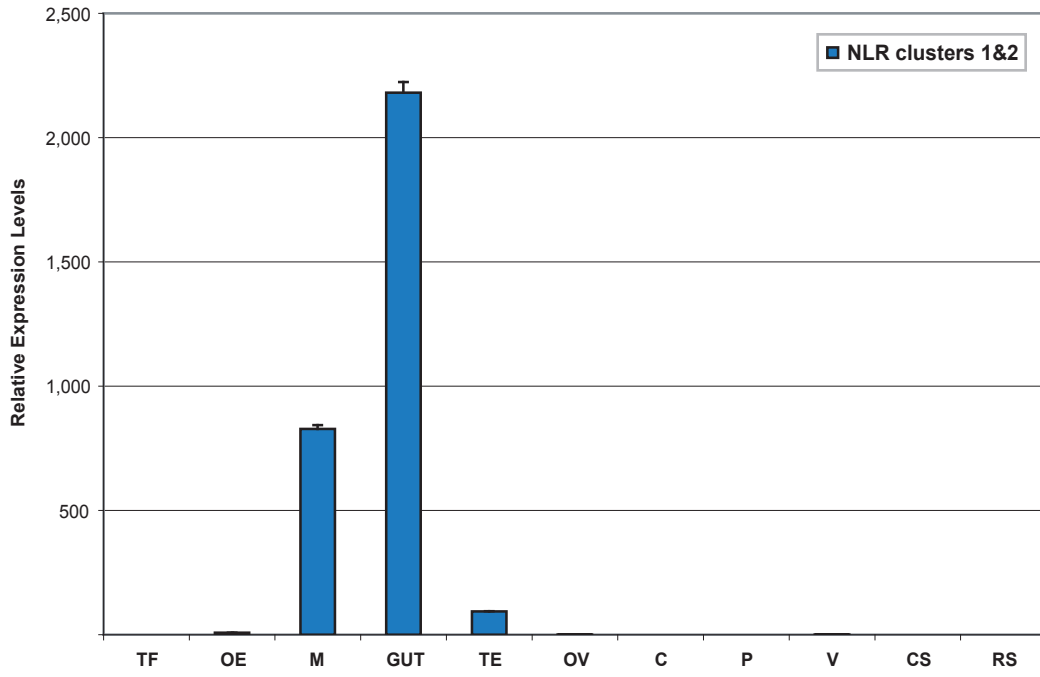

Hibino et al. Figure S6

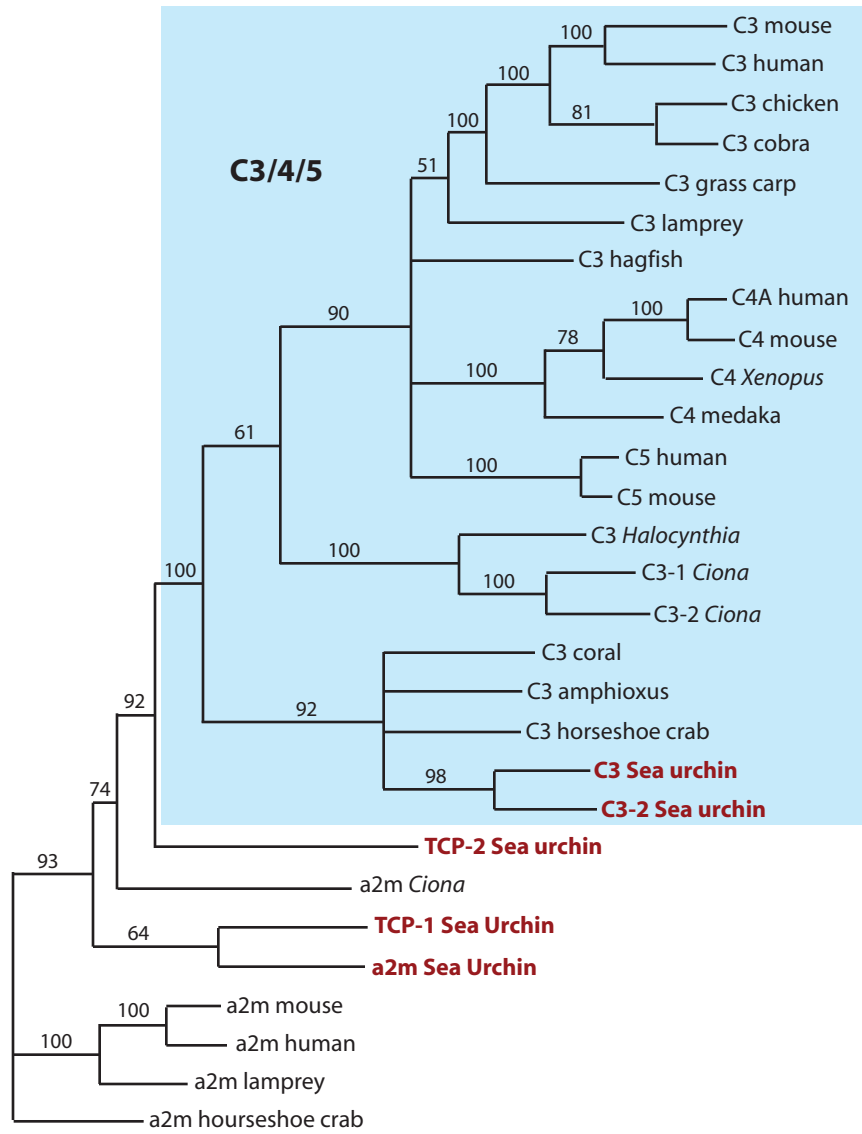

Hibino et al. Figure S7
